# Supplementary material for: Importance of reporting survival as incidence: a cross-sectional comparative study on out-of-hospital cardiac arrest registry data from Germany and Norway
Source: PubMed Central journal article supplement — BMJ Open. 2022 Feb 16;12(2):e058381. doi: 10.1136/bmjopen-2021-058381 (PMC8860078; doi:10.1136/bmjopen-2021-058381), 2022-02-16
Supplement: bmjopen-2021-058381.draft_revisions.pdf [file bmjopen-2021-058381.draft_revisions.pdf]

# BMJ Open

BMJ Open is committed to open peer review. As part of this commitment we make the peer review history of every article we publish publicly available.

When an article is published we post the peer reviewers' comments and the authors' responses online. We also post the versions of the paper that were used during peer review. These are the versions that the peer review comments apply to.

The versions of the paper that follow are the versions that were submitted during the peer review process. They are not the versions of record or the final published versions. They should not be cited or distributed as the published version of this manuscript.

BMJ Open is an open access journal and the full, final, typeset and author-corrected version of record of the manuscript is available on our site with no access controls, subscription charges or pay-per-view fees (<http://bmjopen.bmj.com>).

If you have any questions on BMJ Open's open peer review process please email [info.bmjopen@bmj.com](mailto:info.bmjopen@bmj.com)

# BMJ Open

## THE IMPORTANCE OF REPORTING SURVIVAL AS INCIDENCE. A CROSS-SECTIONAL COMPARATIVE STUDY ON OUT-OF-HOSPITAL CARDIAC ARREST REGISTRY DATA FROM GERMANY AND NORWAY

|                               |                                                                                                                                                                                                                                                                                                                                                                                                                                                                                                                                                                                                                                                                                                                                                                                                                                                                                                                                                                                                                                                                                                                                                                                                                                                            |
|-------------------------------|------------------------------------------------------------------------------------------------------------------------------------------------------------------------------------------------------------------------------------------------------------------------------------------------------------------------------------------------------------------------------------------------------------------------------------------------------------------------------------------------------------------------------------------------------------------------------------------------------------------------------------------------------------------------------------------------------------------------------------------------------------------------------------------------------------------------------------------------------------------------------------------------------------------------------------------------------------------------------------------------------------------------------------------------------------------------------------------------------------------------------------------------------------------------------------------------------------------------------------------------------------|
| Journal:                      | <i>BMJ Open</i>                                                                                                                                                                                                                                                                                                                                                                                                                                                                                                                                                                                                                                                                                                                                                                                                                                                                                                                                                                                                                                                                                                                                                                                                                                            |
| Manuscript ID                 | bmjopen-2021-058381                                                                                                                                                                                                                                                                                                                                                                                                                                                                                                                                                                                                                                                                                                                                                                                                                                                                                                                                                                                                                                                                                                                                                                                                                                        |
| Article Type:                 | Original research                                                                                                                                                                                                                                                                                                                                                                                                                                                                                                                                                                                                                                                                                                                                                                                                                                                                                                                                                                                                                                                                                                                                                                                                                                          |
| Date Submitted by the Author: | 15-Oct-2021                                                                                                                                                                                                                                                                                                                                                                                                                                                                                                                                                                                                                                                                                                                                                                                                                                                                                                                                                                                                                                                                                                                                                                                                                                                |
| Complete List of Authors:     | Tjelmeland, Ingvild Beathe; Universitätsklinikum Schleswig-Holstein, Institute for Emergency Medicine; University of Oslo, Faculty of Medicine<br>Alm-Kruse, Kristin; Oslo University Hospital, Division of Emergencies and Critical Care; University of Oslo Faculty of Medicine,<br>Grasner, Jan-Thorsten; Universitätsklinikum Schleswig-Holstein, Institute for Emergency Medicine; Universitätsklinikum Schleswig-Holstein, Department of Anaesthesiology and Intensive Care Medicine<br>Isern, Cecilie Benedicte; University of Oslo, Faculty of Medicine; Oslo University Hospital, Division of Prehospital Services<br>Jakisch, Barbara; imland gGmbH<br>Kramer-Johansen, Jo; Universitetet i Oslo Institutt for klinisk medisin, Faculty of Medicine; Oslo University Hospital, Division of Prehospital Services<br>Renzing, Niels; University Hospital Schleswig Holstein, Institute for Emergency Medicine<br>Wnent, Jan; Universitätsklinikum Schleswig-Holstein, Institute for Emergency Medicine; University of Namibia School of Medicine<br>Seewald, Stephan; Universitätsklinikum Schleswig-Holstein, Institute for Emergency Medicine; University Hospital Schleswig Holstein, Department of Anaesthesiology and Intensive Care Medicine |
| Keywords:                     | Cardiac Epidemiology < CARDIOLOGY, EPIDEMIOLOGY, Adult intensive & critical care < INTENSIVE & CRITICAL CARE, PUBLIC HEALTH                                                                                                                                                                                                                                                                                                                                                                                                                                                                                                                                                                                                                                                                                                                                                                                                                                                                                                                                                                                                                                                                                                                                |
|                               |                                                                                                                                                                                                                                                                                                                                                                                                                                                                                                                                                                                                                                                                                                                                                                                                                                                                                                                                                                                                                                                                                                                                                                                                                                                            |

SCHOLARONE™  
Manuscripts

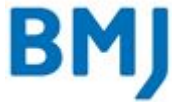

I, the Submitting Author has the right to grant and does grant on behalf of all authors of the Work (as defined in the below author licence), an exclusive licence and/or a non-exclusive licence for contributions from authors who are: i) UK Crown employees; ii) where BMJ has agreed a CC-BY licence shall apply, and/or iii) in accordance with the terms applicable for US Federal Government officers or employees acting as part of their official duties; on a worldwide, perpetual, irrevocable, royalty-free basis to BMJ Publishing Group Ltd ("BMJ") its licensees and where the relevant Journal is co-owned by BMJ to the co-owners of the Journal, to publish the Work in this journal and any other BMJ products and to exploit all rights, as set out in our [licence](#).

The Submitting Author accepts and understands that any supply made under these terms is made by BMJ to the Submitting Author unless you are acting as an employee on behalf of your employer or a postgraduate student of an affiliated institution which is paying any applicable article publishing charge ("APC") for Open Access articles. Where the Submitting Author wishes to make the Work available on an Open Access basis (and intends to pay the relevant APC), the terms of reuse of such Open Access shall be governed by a Creative Commons licence – details of these licences and which [Creative Commons](#) licence will apply to this Work are set out in our licence referred to above.

Other than as permitted in any relevant BMJ Author's Self Archiving Policies, I confirm this Work has not been accepted for publication elsewhere, is not being considered for publication elsewhere and does not duplicate material already published. I confirm all authors consent to publication of this Work and authorise the granting of this licence.

# THE IMPORTANCE OF REPORTING SURVIVAL AS INCIDENCE

## A CROSS-SECTIONAL COMPARATIVE STUDY ON OUT-OF-HOSPITAL CARDIAC

### ARREST REGISTRY DATA FROM GERMANY AND NORWAY

Ingvild Tjelmeland <sup>1,2,3</sup>, Kristin Alm-Kruse <sup>2,4</sup>, Jan-Thorsten Gräsner <sup>1,5</sup>, Cecilie Benedicte

Isern <sup>2,3</sup>, Barbara Jakisch <sup>6</sup>, Jo Kramer-Johansen <sup>2,3</sup>, Niels Renzing <sup>1</sup>, Jan Wnent <sup>1,5,7</sup>, Stephan

Seewald <sup>1,5</sup>

1. University Hospital Schleswig-Holstein, Institute for Emergency Medicine, Kiel, Germany
2. Faculty of Medicine, Institute of Clinical Medicine, University of Oslo, Norway
3. Division of Prehospital Services, Oslo University Hospital, Norway
4. Dep of Research & Development, Division of Emergencies and Critical Care, Oslo University Hospital, Norway
5. University Hospital Schleswig-Holstein, Department of Anaesthesiology and Intensive Care Medicine, Kiel, Germany
6. Imland gGmbH, Rendsburg, Germany
7. University of Namibia, School of Medicine, Windhoek, Namibia

#### **Corresponding author**

Ingvild Tjelmeland

Oslo University Hospital,

1

1  
2  
3 Kirkeveien 166, 0424 Oslo  
4

5 Email: [ingvild@nakos.no](mailto:ingvild@nakos.no)  
6

7 Telephone: +4795801490  
8  
9

10  
11  
12 Word count abstract: 285  
13

14 Word count: 3087  
15  
16  
17  
18  
19  
20  
21  
22  
23  
24  
25  
26  
27  
28  
29  
30  
31  
32  
33  
34  
35  
36  
37  
38  
39  
40  
41  
42  
43  
44  
45  
46  
47  
48  
49  
50  
51  
52  
53  
54  
55  
56  
57  
58  
59  
60

For peer review only

## ABSTRACT

**Objectives:** Health registries are a unique source of information about current practice and can describe disease burden in a population. We aimed to understand similarities and differences in the German Resuscitation Registry (GRR) and the Norwegian Cardiac Arrest Registry (NorCAR) and compare incidence and survival for patients resuscitated after out-of-hospital cardiac arrest.

**Design:** A cross-sectional comparative analysis reporting incidence and outcome on a population level.

**Setting:** We included data from the cardiac arrest registries in Germany and Norway.

**Participants:** Patients resuscitated between 1<sup>st</sup> January 2015 and 31<sup>st</sup> December 2019 were included, resulting in 29,222 cases from GRR and 16,406 cases from NorCAR. From GRR, only emergency medical services (EMS) reporting survival information for patients admitted to hospital were included.

**Primary and secondary outcome measures:** This study focused on the EMS systems, the registries, and the patients included in both registries. The results compare the total incidence, incidence of patients resuscitated by EMS and the incidence of survival.

**Results:** We found an incidence of 68 per 100,000 inhabitants in GRR and 63 in NorCAR. The incidence of patients treated by EMS was 67 in GRR and 53 in NorCAR. The incidence of patients arriving at a hospital was higher in GRR (24.3) than in NorCAR (15.1), but survival was similar (8 in GRR and 7.8 in NorCAR).

**Conclusion:** GRR is a voluntary registry, and in-hospital information is not reported for all cases. NorCAR has mandatory reporting from all EMS and hospitals. EMS in Germany starts treatment on more patients and bring a higher number to hospital, but we found no difference

1  
2  
3 in the incidence of survival. This study has improved our knowledge of both registries and  
4  
5 highlighted the importance of reporting survival as incidence when comparing registries.  
6  
7  
8  
9

10 **Keywords:**

11  
12 cardiac arrest, registry, reporting, cohort study, incidence survival  
13  
14  
15  
16  
17

18 **ARTICLE SUMMARY**

19  
20  
21 **Strengths and limitations of this study:**

- 22  
23  
24 • Prospective cardiac arrest registries provide knowledge about treatment and results in  
25 real life in contrast to highly selected populations in clinical studies.  
26  
27  
28 • When analysing data from different systems and countries, results must be related to  
29 the population covered to increase comparability.  
30  
31  
32  
33 • In our study, overall survival on a population level is similar in Germany and Norway,  
34 in contrast to prior publications that have compared survival rates as percentages of  
35 the EMS treated patients.  
36  
37  
38  
39  
40 • In Germany, the General Data Protection Regulation interpretation is associated with  
41 more missing information on survival status than results from the Norwegian registry.  
42  
43  
44  
45  
46  
47  
48  
49  
50  
51  
52  
53  
54  
55  
56  
57  
58  
59  
60

## INTRODUCTION

Health registries are a unique source of information about current practice and the first of many steps in improving treatment and care<sup>1</sup>. Registries can be used for epidemiological and outcome reports for many health conditions, describe the burden of disease and the effectiveness of treatment. Registries can also be beneficial in quality improvement projects,<sup>2</sup> and for political accountability. Registries on out-of-hospital cardiac arrest (OHCA) are of particular interest as a successful outcome depends on a complex chain involving the population, medical dispatch, emergency medical services and hospital treatment<sup>3</sup>.

For a society to improve survival after OHCA, detailed and reliable data must guide our efforts. Several studies and reviews have compared outcomes across countries and jurisdictions<sup>4-8</sup>. Despite the international consensus of which data to collect and how to collect it,<sup>9</sup> results vary greatly, even within groups presumed to have similar characteristics<sup>10 11</sup>. Survival is often reported as rates and not as incidence per 100,000 inhabitants, making comparisons almost impossible due to the varying denominator.

This study aimed to understand the German Resuscitation Registry (GRR) and the Norwegian Cardiac Arrest Registry (NorCAR) and compare the incidence of included patients and survival. As a background for our analysis, we describe the care provided to OHCA patients and data collection into the registries. We present incidence and outcome in the catchment areas and the Utstein comparator group (witnessed by a bystander and having a shockable rhythm)<sup>9</sup>.



## METHODS

### Healthcare in Germany

Germany is a federal parliamentary republic consisting of 16 states and covers 357,386 square kilometres (km<sup>2</sup>). In 2019 Germany had 85 million inhabitants. The population density was about 238 inhabitants per km<sup>2</sup> <sup>12</sup>.

The emergency medical services (EMS) in Germany is a two-tiered system consisting of emergency medical technicians (EMT) or paramedics and emergency-physician. Teaching paramedics often have education on a bachelor level, but this is not common for paramedics working in the field. Ambulances personnel provide primary care and patient transportation, and a medical vehicle or helicopter carries an emergency physician to the patient location for all cardiac arrest situations<sup>13</sup>.

A standard emergency number, 1-1-2, terminates at an Emergency Medical Communications Centres (EMCC). EMTs or paramedics are call-takers. Each state organises their specialist health care, resulting in differences in the EMCCs. There are 1,900 hospitals with a 24/7 emergency department, resulting in 23 hospitals per 1 million inhabitants. Due to German data protection laws, using a single patient identification number in health care is not possible. Health insurance or the state covers health care in Germany<sup>12</sup>.

Hospitals with an internal medicine department and an emergency department treat patients that survive to hospital admission. Recently a unique certification for cardiac-arrest centres

1  
2  
3 was established. To get certified, hospitals must fulfil criteria, including 24/7 Percutaneous  
4  
5 Coronary Intervention (PCI) service and have protocols for post-cardiac arrest care.  
6  
7  
8  
9

### 10 **Healthcare in Norway**

11  
12 Norway is a representative democratic constitutional monarchy covering a total land area of  
13  
14 304,282 km<sup>2</sup> and had 5.3 million inhabitants in 2019. The population density is about 18  
15  
16 inhabitants per km<sup>2</sup> <sup>12</sup>.  
17  
18  
19

20  
21 The EMS in Norway consists of ambulances, boats and helicopters, search and rescue  
22  
23 helicopters, small aeroplanes and physician-manned cars. The helicopters, planes and  
24  
25 physician-manned cars have rescue-EMS personnel and an anesthesiologist/emergency  
26  
27 physician. Ambulance personnel have an education level of minimum upper secondary school  
28  
29 and a two-year apprenticeship. In recent years, several universities have established bachelor  
30  
31 programs for paramedics.  
32  
33  
34  
35  
36

37  
38 The Norwegian single-payer public insurance covers all aspects of health care, including the  
39  
40 ambulance service. For medical emergencies, there is a dedicated telephone number, 1-1-3,  
41  
42 that terminates at 16 local EMCC. Nurses and ambulance personnel receive the calls.  
43  
44

45  
46 Specialist health care is organised in four regional and 19 local health trusts, with 50 hospitals  
47  
48 with an emergency department, resulting in 9.4 hospitals per 1 million inhabitants<sup>12</sup>. Based on  
49  
50 national recommendations, all hospitals have protocols for care for patients surviving to  
51  
52 hospital admission. Within each region in Norway, referral hospitals offer 24/7 PCI, and  
53  
54 bypass protocols are in place. A personal identification number identifies the patient in all  
55  
56 contact with specialist health care.  
57  
58  
59  
60

### **The German resuscitation registry (GRR)**

GRR is a voluntary based registry established in 2007 by the German Society of Anaesthesiology and Intensive Care Medicine. In 2019, GRR received information from EMS covering 26.6 million inhabitants (31% of the inhabitants of Germany and with EMS from all parts of the country). The registry includes fully anonymised data from patients suffering cardiac arrest both outside and in the hospital. In addition to data collection and benchmarking, GRR provides risk adjustment analysis for its participants<sup>14 15</sup>.

The inclusion criteria in GRR is; all EMS attended cardiac arrests. Participants in the registry enter information from the EMS services and may add in-hospital treatment, survival to hospital discharge, and 30-day survival if this information is available. Due to different interpretations of the General Data Protection Regulation (GDPR), in-hospital treatment of OHCA patients is not always available for the reporting EMS system. An area with good data quality has; an incidence above 30/100,000 inhabitants per year, ROSC in less than 80% of cases, information about ROSC-after-cardiac-arrest in more than 60% of the cases, and, if relevant, documented hospital care available for more than 30% of the cases<sup>16</sup>.

### **The Norwegian Cardiac Arrest Registry (NorCAR)**

National Advisory Unit on Prehospital Emergency Medicine established NorCAR in 2002, and the registry received status as a mandatory national health registry in September 2013.

The registry includes cardiac arrests both outside and in the hospital. By May 2016, all health trusts reported OHCA to the registry. Oslo University Hospital hosts the registry, and the Norwegian Institute of Public Health has the legal responsibility<sup>17</sup>.

8

1  
2  
3  
4  
5 Inclusion criteria in the registry is; patients suffering cardiac arrest, where bystanders, first  
6 responders or healthcare professionals start any kind of treatment. Treatment is basic or  
7 advanced cardiopulmonary resuscitation (CPR) or defibrillation. Patients suffering cardiac  
8 arrest that do not receive any CPR are not included in the registry<sup>17</sup>.  
9  
10  
11  
12  
13  
14  
15  
16

### 17 **Participants**

18  
19 This study included all patients from NorCAR and all patients where resuscitation was  
20 attempted from areas in GRR with good data quality. The patients had a cardiac arrest  
21 between 1<sup>st</sup> January 2015 and 31<sup>st</sup> December 2019.  
22  
23  
24  
25  
26  
27

### 28 **Variables**

29  
30 All data variables in the registries are available in the local languages. Variables were  
31 translated into English to make comparison possible and to ensure an equal understanding of  
32 the definitions. Although both registries use the Utstein definitions, the German registry  
33 reports any return of spontaneous circulation (ROSC) while the Norwegian registry reports  
34 sustained ROSC (ROSC for more than 20 minutes or to hospital admission). Therefore, the  
35 shared data points “Transport to hospital” and “Arrival to hospital with ROSC” was used. For  
36 the overall survival, we used survival to hospital discharge in GRR and 30-day survival in  
37 NorCAR.  
38  
39  
40  
41  
42  
43  
44  
45  
46  
47  
48  
49  
50

### 51 **Patient and Public Involvement**

52  
53 NorCARs steering committee has a user representative who has been actively involved in  
54 planning this and earlier projects in NorCAR. He represents the patient organisation National  
55  
56  
57  
58  
59  
60

1  
2  
3 Association of Heart and Lung Disease (LHL) with 54,000 members. Through his network of  
4 fellow user representatives, he provides a channel for communication to the patient population  
5 and the boards of the health trusts. At several meetings, the user representative has expressed  
6 concern regarding the difficulties of comparing data from different regions in Norway and  
7 differences between countries. We believe this study addresses these challenges, and we also  
8 suggest a method for reducing the reported differences by presenting results as incidence, not  
9 at percentages.  
10  
11  
12  
13  
14  
15  
16  
17  
18  
19  
20

## 21 **Checklist**

22  
23 The STROBE cross-sectional reporting guideline was used when formatting the manuscript<sup>18</sup>.  
24  
25  
26  
27  
28  
29

## 30 **STATISTICAL METHODS**

31  
32 We provide descriptive measures as mean with standard deviation (SD) or median, as  
33 appropriate according to the data distribution. We calculated incidence for regions reporting  
34 part of a year by dividing the number of patients by the corresponding fraction of the person-  
35 years for that region. For bystander efforts (CPR and use of public defibrillators) and  
36 calculation of EMS response intervals, we excluded EMS witnessed cardiac arrests. We  
37 analysed the Utstein comparator group based on the 2014 definition,<sup>9</sup> including patients with  
38 a bystander-witnessed collapse and an initial shockable rhythm. For the cause of arrest, we  
39 used the Utstein definition from 2004<sup>19</sup>. During several personal meetings, we reviewed the  
40 results and rechecked the analyses. Figures 1 and 2 describe the inclusion and exclusion of  
41 patients in GRR and NorCAR. Analyses were carried out using IBM SPSS Statistics 27. P-  
42  
43  
44  
45  
46  
47  
48  
49  
50  
51  
52  
53  
54  
55  
56  
57  
58  
59  
60

values are calculated based on the incidence, and a p-value <0.05 was considered statistically significant.

## RESULTS

### Demographics

Between 2015 and 2019, 29,222 cases were registered in GRR (68 per 100,000 inhabitants) and 16,406 cases in NorCAR (63 per 100,000 inhabitants). The patients in GRR were older than the patients in NorCAR, more often had presumed cardiac cause, had a shockable rhythm and were more likely to be unwitnessed (Table 1). Gender and the location of arrest were similar.

*Table 1: Cardiac arrest characteristics for all resuscitated patients in GRR and NorCAR, 2015-2019.*

| All patients included in the analysis | GRR<br>N = 29222 | NorCAR<br>N = 16406 | P-value |
|---------------------------------------|------------------|---------------------|---------|
| Incidence per 100,000 inhabitants     | 68.2             | 63.2                | p<0.001 |
| Age in years - Median (IQR)           | 73 (60-82)       | 68 (54-79)          | p<0.001 |
| Age in years – missing                | 195              | 17                  |         |
| Male (%)                              | 19109 (65)       | 10906 (66)          | p=0.021 |
| Gender – missing                      | 5                | -                   |         |
| At home (%)                           | 18242 (62)       | 10122 (62)          | p=0.124 |

|                               |            |            |          |
|-------------------------------|------------|------------|----------|
| Location - missing            | 151        | 98         |          |
| Presumed cardiac cause (%)    | 21793 (75) | 10990 (67) | p<0.001  |
| Initial rhythm shockable (%)  | 6753 (23)  | 3253 (20)  | p<0.001  |
| Initial rhythm – missing (%)  | 100 (<1)   | 2301 (14)  |          |
| Witnessed status (%)          |            |            | p<0.001  |
| Bystander witnessed (%)       | 12622 (43) | 8403 (51)  | p<0.001* |
| First-responder witnessed (%) | 399 (1)    | 11 (<1)    | p<0.001* |
| EMS witnessed (%)             | 3688 (13)  | 1861 (11)  | P=0.001* |
| CA not witnessed (%)          | 12455 (43) | 6124 (35)  | p<0.001* |
| CA witnessed – missing (%)    | 58 (<1)    | 7 (<1)     | p<0.001* |

GRR – German Resuscitation Registry – areas with good data quality, NorCAR – Norwegian Cardiac Arrest Registry, CPR – cardiopulmonary resuscitation, CA – cardiac arrest, EMS – emergency medical service. \* P-values from post hoc testing (chi-square test) and corrected by the Bonferroni method.

### All patients except EMS witnessed cardiac arrests

The incidence of patients receiving bystander CPR, having a public defibrillator connected, and receiving a shock before EMS arrival was higher in NorCAR than in GRR, giving a higher number of patients successfully resuscitated before EMS arrival (Table 2).

*Table 2: Patients resuscitated by bystander or EMS, except EMS and first responder witnessed cardiac arrests.*

| All patients except EMS and first responder witnessed                           | GRR<br>N=25135 | NorCAR<br>N=14545 | P-value |
|---------------------------------------------------------------------------------|----------------|-------------------|---------|
| Incidence per 100,000 inhabitants                                               | 58.7           | 55.2              | p<0.001 |
| Median response interval in minutes (IQR)                                       | 8 (6-10)       | 9 (6-14)          | p<0.001 |
| Response interval - missing (%)                                                 | 608 (2)        | 252 (2)           |         |
| Bystander CPR (%)                                                               | 1056 (44)      | 11803 (82)        | p<0.001 |
| Public defibrillator connected (%)                                              | 482 (2)        | 853 (6)           | p<0.001 |
| Shock by public defibrillator if attached (%) *                                 | 126 (26)       | 260 (30)          | p<0.001 |
| Shocked by public defibrillator before EMS arrival, and ROSC on EMS arrival (%) | 107 (0.4)      | 116 (0.8)         | p<0.001 |

GRR – German Resuscitation Registry – areas with good quality data, NorCAR – Norwegian

Cardiac Arrest Registry, EMS – emergency medical service, CPR – cardiopulmonary

resuscitation. \* Percentage of connected defibrillators

The median response interval was 8 minutes in GRR (IQR 6-10) and 9 minutes in NorCAR (IQR 6-14). In NorCAR, the EMS personnel chooses not to start resuscitation, despite bystanders having started CPR, in 16% of the patients, most of whom had a pulse on EMS arrival. The proportion of patients not treated by EMS in GRR was 1%.

### **CPR by EMS**

The reported incidence of patients resuscitated by EMS per 100,000 inhabitants was 67 in GRR and 53 in NorCAR. More patients were declared dead on scene in NorCAR, while the incidence of patients “Transported to hospital” and “Arrival to hospital with ROSC” was



higher in GRR. (Table 3) The incidence of 24-hour survival was higher in GRR, but there was no statistical difference in overall survival. (Figure 3)

Table 3: Outcome for all EMS-treated patients per 100,000 inhabitants

| CPR by EMS                                | GRR<br>N=28786 | NorCAR<br>N=13704 | P-value |
|-------------------------------------------|----------------|-------------------|---------|
| Incidence of EMS treated patients         | 67.2           | 52.8              | p<0.001 |
| Incidence of transport to hospital (%)*   | 31.7 (47)      | 19.5 (37)         | p<0.001 |
| Status on arrival to hospital             |                |                   |         |
| Incidence of arrival with ROSC (%)        | 24.3 (36)      | 15.1 (29)         | p<0.001 |
| Incidence of arrival with ongoing CPR (%) | 7.4 (11)       | 4.1 (8)           | p<0.001 |
| Incidence of 24-hour survival (%) **      | 15.5 (23)      | 13.7 (24)         | p<0.001 |
| Incidence of survival (%) ***             | 8.0 (12)       | 7.8 (15)          | p=0.42  |

GRR – German Resuscitation Registry – areas with good quality data, NorCAR – Norwegian Cardiac Arrest Registry, ROSC – return of spontaneous circulation, CPR - cardiopulmonary resuscitation, EMS – emergency medical service, PCI - Percutaneous Coronary Intervention.

\* Declared dead/transport to hospital – missing 265 (1%) in GRR and 104 (1%) in NorCAR,

\*\* 24-hour survival – missing 2273 (8%) in GRR and 195 (1%) in NorCAR

\*\*\* Survival – missing 1931 (7%) in GRR and 165 (1%) in NorCAR

The use of a mechanical chest compressions device was higher in NorCAR than in GRR (4020 of 13704 (29%) vs 3223 of 28786 (11%) respectively, p<0.001). For patients transported to hospital and arriving with ROSC or ongoing CPR, 1987 of 13571 (15%) of the

patients in GRR and 1079 of 4962 (22%) of the patients in NorCAR were transported directly to the PCI lab on arrival.

### Utstein comparator group

The incidence of patients in the Utstein group was higher in GRR, but they constituted a smaller proportion of the EMS-treated population (14 vs 17 %). Bystander CPR was higher in NorCAR (1961 of 2274 (86%)) than in GRR (2726 of 4155 (66%)). For patients transported to hospital and arriving with ROSC or ongoing CPR, 879 of 3362 (26%) of the patients in GRR and 548 of 1502 (37%) of the patients in NorCAR were transported directly to the PCI lab on arrival. The incidence of prehospital ROSC and survival to 24-hours was higher in GRR (Table 4 and Figure 4), but the incidence of overall survival was higher in NorCAR.

Table 4: Outcome for the Utstein comparator group per 100,000 inhabitants

| Utstein comparator group                              | GRR<br>N=4155 | NorCAR<br>N= 2274 | P-value |
|-------------------------------------------------------|---------------|-------------------|---------|
| Incidence in the Utstein comparator group             | 9.7           | 8.8               | p<0.001 |
| Incidence of transport to hospital (%) *              | 7.8 (81)      | 6.2 (71)          | p<0.001 |
| Status on arrival to hospital                         |               |                   |         |
| Incidence of arrival to hospital with ROSC (%)        | 6.4 (66)      | 5.0 (57)          | p<0.001 |
| Incidence of arrival to hospital with ongoing CPR (%) | 1.4 (15)      | 0.8 (9)           | p<0.001 |
| Incidence of 24-hour survival (%) **                  | 5.0 (13)      | 5.2 (54)          | p=0.21  |
| Incidence of survival (%) ***                         | 3.5 (36)      | 3.8 (43)          | p=0.04  |

GRR – German Resuscitation Registry – areas with good quality data, NorCAR – Norwegian Cardiac Arrest Registry, Utstein comparator group - out-of-hospital cardiac arrest (OHCA)

1  
2  
3 *witnessed by a bystander and shockable first rhythm. CPR - cardiopulmonary resuscitation,*  
4  
5 *ROSC – return of spontaneous circulation, EMS – emergency medical service.*  
6

7 *\* Declared dead/transport to hospital – missing, 16 (<1%) in GRR and 1 (<1%) in NorCAR.*  
8

9  
10 *\*\* 24-hour survival – missing, 541 (13%) in GRR and 28 (1%) in NorCAR.*  
11

12 *\*\*\* Survival – missing, 455 (11%) in GRR and 24(1%) in NorCAR.*  
13  
14  
15  
16  
17

## 18 **DISCUSSION**

19  
20  
21 The incidence of cardiac arrest per 100,000 inhabitants is higher in GRR compared to  
22  
23 NorCAR. GRR reports a higher incidence of EMS treated patients, a higher incidence of  
24  
25 patients transported to the hospital and a higher incidence of patients arriving in the hospital  
26  
27 with ROSC. The overall incidence of survival is similar in both countries. For the Utstein  
28  
29 comparator group, the incidence of survival is marginally higher in NorCAR. Patient  
30  
31 characteristics in both countries, such as age and gender, confirms previous reports<sup>6</sup>.  
32  
33  
34  
35  
36

37 Using registry data from two different countries, we encountered some challenges. A certain  
38  
39 amount of recoding of variables had to be done, notably using survival to hospital discharge  
40  
41 in GRR and 30-day survival in NorCAR. Both survival to discharge, and 30-day survival,  
42  
43 have been used interchangeably in other international studies, including the latest  
44  
45 recommendations for reporting<sup>9</sup>. Also, in a registry, it is not easy to verify the completeness  
46  
47 of cases<sup>20</sup>. Most EMS services in Europe have a paper-based reporting system, and there are  
48  
49 no electronically available patient charts to use as controls. Both GRR and NorCAR are  
50  
51 dependent on the attending EMS personnel remembering to submit a form after the event.  
52  
53  
54 This form is then manually entered into the registry database by data managers.  
55  
56  
57

58 16  
59  
60

1  
2  
3  
4  
5 Comparing a voluntary registry with a mandatory registry, we were worried about missing  
6 information. In the latest published update on uniform reporting of cardiac arrest, the Utstein  
7 reporting format, the authors stress the importance of reducing missing information<sup>9</sup>. We  
8 found that the rate of missing information is overall higher in GRR, and the variable with the  
9 highest missing rate is survival (7 %). Survival information is mostly missing from entire  
10 hospitals, indicating that missing cases include both survivors and non-survivors. Due to GRR  
11 being a voluntary registry, information on cardiac arrest cases is not available from the entire  
12 country. Results are, however, comparable to overall results in yearly reports from GRR and  
13 the data in this study are considered to be representable for all regions reporting to the  
14 registry<sup>16</sup>.

15  
16  
17  
18  
19  
20  
21  
22  
23  
24  
25  
26  
27  
28  
29  
30 Reporting the incidence of cardiac arrest is primarily done using the number of patients per  
31 100,000 inhabitants in the population served by the EMS<sup>6-8</sup>. Survival, however, is often  
32 presented as a proportion of the EMS treated patients. Percentages are presumed to be easier  
33 to understand and make comparability with already published data more straightforward.  
34  
35 During the Covid-19 pandemic, healthcare professionals and the general public have become  
36 more used to population incidence as a measurement, and we believe it is time for survival  
37 after cardiac arrest to be published in this way. In 1993, Becker et al.<sup>21</sup> published an analysis  
38 on the relationship between reported incidence and survival rates and advised incidence and  
39 not percentages. When there is more than a 3-fold difference in the incidence of EMS treated  
40 patients, as reported in the latest EuReCa study,<sup>6</sup> higher survival rates do not necessarily  
41 represent better quality of care. The difference could be that a registry with a low survival  
42 percentage is better at identifying all patients resuscitated by the EMS. Our study shows that  
43 the incidence of survival is similar in GRR and NorCAR, but the incidence of included  
44  
45  
46  
47  
48  
49  
50  
51  
52  
53  
54  
55  
56  
57  
58  
59  
60

1  
2  
3 patients is not. If we calculate the survival rate based on the number of patients resuscitated  
4  
5 by the EMS, Norway seems to have better survival (15%) than Germany (12%).  
6  
7  
8  
9

10 Differences in the incidence of cardiac arrest overall, and the EMS treated patients in  
11  
12 particular, could be due to differences in public health in general and cardiovascular health in  
13  
14 particular. According to the European Unions' statistics, cardiovascular disease deaths account  
15  
16 for 37% of deaths in Germany, but only 26% in Norway<sup>22</sup>. Population density, geography and  
17  
18 placement of ambulances might also have an impact. Both countries adhere to European  
19  
20 guidelines for resuscitation,<sup>23</sup> but in Norway, withholding care in the prehospital setting is  
21  
22 more common.  
23  
24  
25  
26  
27

28 Response interval is the time interval from a call is received at an EMCC to the first  
29  
30 ambulance arrives at the defined address. Response interval should ideally include the delay  
31  
32 until EMS personnel are at the patient side, but the latter time point remains elusive due to  
33  
34 manual registration. The extended response interval in Norway provides dispatchers more  
35  
36 time to help bystanders start CPR, connect and use a defibrillator, and is associated with a  
37  
38 significantly higher number of patients having been successfully resuscitated before EMS  
39  
40 arrival. On the downside, it probably also has a negative effect on survival<sup>24 25</sup>. The narrow  
41  
42 distribution of response intervals in GRR (25- and 75-percentiles of 6 and 10 minutes)  
43  
44 compared with the broader distribution found in NorCAR (25- and 75-percentiles of 6 and 14  
45  
46 minutes) indicates differences caused by geography and population density. Extended  
47  
48 response intervals might also explain the lower incidence of EMS treated patients in Norway  
49  
50 as bystanders or EMS personnel perceive resuscitation as futile when the response interval is  
51  
52 prolonged.  
53  
54  
55  
56  
57  
58  
59  
60

1  
2  
3 The Utstein comparator group is a sub-group that enables comparison between countries<sup>9</sup>.  
4  
5 This sub-group has a more uniform treatment recommendation than the total population of  
6  
7 patients with OHCA and does not include cases with unknown delay from collapse. Our  
8  
9 results confirm that the differences between our countries also extends to this specific group.  
10  
11 Differences between countries in the Utstein comparator group have been shown in several  
12  
13 studies previously<sup>6 10 26</sup>.  
14  
15  
16  
17  
18

19 In Norway, all hospitals are state-owned, and the Norwegian Directory of Health issues  
20  
21 guidelines for treatment. Results from quality registries are published yearly, naming and  
22  
23 shaming hospitals and their adherence to guidelines<sup>27</sup>. There is a bypass protocol for the  
24  
25 nearest University Hospital capable of performing PCI for cardiac arrest patients. If transport  
26  
27 duration is prolonged, there are guidelines for prehospital treatment, including thrombolysis.  
28  
29 In Norway, the in-hospital treatment after OHCA is standardised, but this is not the case in  
30  
31 most German hospitals. In 2019, the German Resuscitation Council started an initiative to  
32  
33 certify cardiac arrest centres, and GRR extended the benchmarking facilities for cardiac arrest  
34  
35 centres<sup>28</sup>.  
36  
37  
38  
39  
40  
41

42 Several factors are associated with increased survival after OHCA; younger age, presumed  
43  
44 cardiac cause, shockable first rhythm, witnessed collapse, location of arrest in a public place,  
45  
46 bystander CPR, early shock by a defibrillator, a short time from collapse to arrival of EMS  
47  
48 and good post-resuscitation care including temperature control and PCI<sup>14 29</sup>. Compared to  
49  
50 GRR, the patients in NorCAR are younger, witnessed collapse is more common and more  
51  
52 than four out of five receive bystander CPR. Compared to NorCAR, the patients in GRR more  
53  
54 often have presumed cardiac cause, initial rhythm is shockable, and the EMS's response  
55  
56 interval is shorter. There is a mix of factors associated with survival in both countries.  
57  
58  
59  
60

1  
2  
3  
4  
5 This study has helped us identify differences and similarities in the cardiac arrest registries in  
6 Germany and Norway and identify potential confounders for future studies. In this  
7  
8 comparison, we cannot tease out the relative importance of factors associated with increased  
9  
10 survival, and in future studies, we should analyse individual cases using more sophisticated  
11  
12 statistical methods.  
13  
14  
15  
16  
17  
18  
19

## 20 **CONCLUSION**

21  
22  
23 This cross-sectional study shows the importance of comparing the incidence of survival based  
24 on the population served and not on the percentage of EMS treated patients. When comparing  
25  
26 data from OHCA registries, especially when comparing survival, we recommend using  
27  
28 incidence per 100,000 inhabitants, and we believe it is time to stop reporting survival as  
29  
30 percentages.  
31  
32  
33  
34  
35  
36

37 We found that the EMS in Germany started CPR on a higher number of cardiac arrest  
38 patients, and the incidence of patients transported to the hospital and arriving with ROSC is  
39  
40 higher than in NorCAR. We speculate that the difference in overall incidence and incidence of  
41  
42 EMS treated patients is due to an interaction between response intervals, bystander CPR, age  
43  
44 and EMS organisation. A multivariate analysis should be performed to better understand our  
45  
46 findings.  
47  
48  
49  
50  
51  
52  
53

## 54 **DECLARATION**

### 55 **Competing interests**

56  
57  
58  
59  
60 20

1  
2  
3 JTG reports grants from the German Anaesthesiology Association during the conduct of the  
4 study; personal Speaker fee and travel cost outside the submitted work. All authors report  
5 receiving a grant from the German-Norwegian student centre at Christian-Albrechts-  
6 University in Kiel.  
7  
8  
9  
10  
11  
12  
13

14 Non-financial associations: JW and SS are members of the steering committee of the German  
15 Resuscitation Registry. JKJ is a member of the Steering Committee of the Norwegian Cardiac  
16 Arrest Registry. IT is the leader of the Norwegian Cardiac Arrest Registry.  
17  
18  
19  
20  
21  
22  
23

#### 24 **Funding statement**

25  
26 This work was supported by the German-Norwegian student centre at Christian-Albrechts-  
27 University in Kiel; the funds facilitate meetings in Kiel and Oslo. Award/grant number: not  
28 applicable.  
29  
30  
31  
32  
33  
34

35 No other funding was received.  
36  
37  
38  
39

#### 40 **Ethical approval and consent to participate**

41  
42 The scientific advisory board of the German Resuscitation Registry (Ref. no.: 20190128\_BJ)  
43 and the steering committee of the Norwegian Cardiac Arrest Registry has approved the study  
44 (reference: 23092019\_Article).  
45  
46  
47  
48

49 The study is approved by the ethics committee of the University of Kiel (Ref. no.: D435/21).

50 Informed consent from patients is not needed.  
51  
52  
53  
54  
55

#### 56 **Data sharing statement**

57  
58  
59  
60 21



1  
2  
3 The data that support the findings of this study are available from the German Resuscitation  
4 Registry and the Norwegian Cardiac Arrest Registry through an application to the registry  
5 based on the regulation of each registry. Restrictions apply.  
6  
7  
8  
9  
10

### 11 **Author Contributions**

12  
13  
14 **IT:** contributed to the conception, planning, design, acquisition of data, analysis and  
15 interpretation of data, the first draft of the article, revision of draft and approval of the final  
16 manuscript.  
17  
18

19  
20  
21 **KAK:** contributed to the conception, planning, design, interpretation of data, the first draft of  
22 the article, revision of draft and approval of the final manuscript.  
23  
24

25  
26 **JTG:** contributed to the conception, planning, design, acquisition of data, analysis and  
27 interpretation of data, the first draft of the article, revision of draft and approval of the final  
28 manuscript.  
29  
30

31  
32  
33 **CBI:** contributed to the conception, planning, design, revision of draft and approval of the  
34 final manuscript.  
35  
36

37  
38 **BJ:** contributed to the conception, planning, design, acquisition of data, analysis and  
39 interpretation of data, revision of draft and approval of the final manuscript.  
40  
41

42  
43 **JKJ:** contributed to the conception, planning, design, analysis and interpretation of data, the  
44 first draft of the article, revision of draft and approval of the final manuscript.  
45  
46

47  
48 **NR:** contributed to the conception, planning, design, revision of draft and approval of the  
49 final manuscript.  
50

51  
52 **JW:** contributed to the conception, planning, design, acquisition of data, analysis and  
53 interpretation of data, the first draft of the article, revision of draft and approval of the final  
54 manuscript.  
55  
56  
57  
58  
59

1  
2  
3 **SS:** contributed to the conception, planning, design, acquisition of data, analysis and  
4  
5 interpretation of data, the first draft of the article, revision of draft and approval of the final  
6  
7 manuscript.  
8  
9

## 16 REFERENCES

- 17  
18  
19 1. Resuscitation Academy. 10 STEPS for Improving Survival from Cardiac Arrest. In:  
20  
21 Resuscitation Academy, ed.  
22  
23 [https://globalresuscitationalliance.org/downloads/ebook/10\\_steps\\_2019.pdf](https://globalresuscitationalliance.org/downloads/ebook/10_steps_2019.pdf), 2019.  
24  
25  
26  
27  
28  
29 2. Chamberlain D. A prize worth the effort: a common European registry of out-of-hospital  
30  
31 cardiac arrest. *Resuscitation* 2011;82(8):965-6. doi:  
32  
33 10.1016/j.resuscitation.2011.05.014 [published Online First: 2011/06/21]  
34  
35  
36  
37  
38  
39 3. Cummins RO, Ornato JP, Thies WH, et al. Improving survival from sudden cardiac arrest:  
40  
41 the "chain of survival" concept. A statement for health professionals from the  
42  
43 Advanced Cardiac Life Support Subcommittee and the Emergency Cardiac Care  
44  
45 Committee, American Heart Association. *Circulation* 1991;83(5):1832-47. doi:  
46  
47 10.1161/01.cir.83.5.1832 [published Online First: 1991/05/01]  
48  
49  
50  
51  
52  
53  
54  
55  
56  
57  
58  
59  
60

- 1  
2  
3  
4 4. Nichol G, Thomas E, Callaway CW, et al. Regional variation in out-of-hospital cardiac  
5  
6  
7 arrest incidence and outcome. *JAMA* 2008;300(12):1423-31. doi:  
8  
9  
10 10.1001/jama.300.12.1423 [published Online First: 2008/09/25]  
11  
12  
13  
14 5. Berdowski J, Berg RA, Tijssen JG, et al. Global incidences of out-of-hospital cardiac arrest  
15  
16  
17 and survival rates: Systematic review of 67 prospective studies. *Resuscitation*  
18  
19  
20 2010;81(11):1479-87. doi: 10.1016/j.resuscitation.2010.08.006  
21  
22  
23  
24 6. Grasner JT, Wnent J, Herlitz J, et al. Survival after out-of-hospital cardiac arrest in Europe  
25  
26  
27 - Results of the EuReCa TWO study. *Resuscitation* 2020;148:218-26. doi:  
28  
29  
30 10.1016/j.resuscitation.2019.12.042 [published Online First: 2020/02/07]  
31  
32  
33  
34 7. Kiguchi T, Okubo M, Nishiyama C, et al. Out-of-hospital cardiac arrest across the World:  
35  
36  
37 First report from the International Liaison Committee on Resuscitation (ILCOR).  
38  
39  
40 *Resuscitation* 2020;152:39-49. doi: 10.1016/j.resuscitation.2020.02.044 [published  
41  
42  
43  
44 Online First: 2020/04/10]  
45  
46  
47  
48 8. Gräsner JT, Lefering R, Koster RW, et al. EuReCa ONE-27 Nations, ONE Europe, ONE  
49  
50  
51 Registry: A prospective one month analysis of out-of-hospital cardiac arrest outcomes  
52  
53  
54 in 27 countries in Europe. *Resuscitation* 2016;105:188-95. doi:  
55  
56  
57 10.1016/j.resuscitation.2016.06.004 [published Online First: 2016/06/21]  
58  
59  
60

- 1  
2  
3  
4 9. Perkins GD, Jacobs IG, Nadkarni VM, et al. Cardiac Arrest and Cardiopulmonary  
5  
6 Resuscitation Outcome Reports: Update of the Utstein Resuscitation Registry  
7  
8  
9  
10 Templates for Out-of-Hospital Cardiac Arrest: A Statement for Healthcare  
11  
12  
13 Professionals From a Task Force of the International Liaison Committee on  
14  
15 Resuscitation (American Heart Association, European Resuscitation Council,  
16  
17 Australian and New Zealand Council on Resuscitation, Heart and Stroke Foundation  
18  
19 of Canada, InterAmerican Heart Foundation, Resuscitation Council of Southern  
20  
21 of Canada, InterAmerican Heart Foundation, Resuscitation Council of Southern  
22  
23 Africa, Resuscitation Council of Asia); and the American Heart Association  
24  
25 Emergency Cardiovascular Care Committee and the Council on Cardiopulmonary,  
26  
27 Critical Care, Perioperative and Resuscitation. *Resuscitation* 2015;96:328-40. doi:  
28  
29 10.1016/j.resuscitation.2014.11.002 [published Online First: 2014/12/02]  
30  
31  
32  
33  
34  
35  
36  
37  
38  
39  
40 10. Masterson S, Stromsoe A, Cullinan J, et al. Apples to apples: can differences in out-of-  
41  
42 hospital cardiac arrest incidence and outcomes between Sweden and Ireland be  
43  
44 explained by core Utstein variables? *Scand J Trauma Resusc Emerg Med*  
45  
46  
47  
48  
49 2018;26(1):37. doi: 10.1186/s13049-018-0505-2 [published Online First: 2018/05/05]  
50  
51  
52  
53  
54  
55  
56  
57  
58  
59  
60

- 1  
2  
3  
4 11. Maurer H, Masterson S, Tjelmeland IB, et al. When is a bystander not a bystander any  
5  
6  
7 more? A European survey. *Resuscitation* 2019;136:78-84. doi:  
8  
9  
10 10.1016/j.resuscitation.2018.12.009 [published Online First: 2018/12/21]  
11  
12  
13 12. Tjelmeland IBM, Masterson S, Herlitz J, et al. Description of Emergency Medical  
14  
15  
16 Services, treatment of cardiac arrest patients and cardiac arrest registries in Europe.  
17  
18  
19  
20  
21  
22  
23  
24  
25  
26  
27  
28  
29  
30  
31  
32  
33  
34 14. Grasner JT, Meybohm P, Lefering R, et al. ROSC after cardiac arrest--the RACA score to  
35  
36  
37 predict outcome after out-of-hospital cardiac arrest. *European heart journal*  
38  
39  
40  
41  
42  
43  
44  
45  
46  
47  
48  
49  
50  
51  
52  
53  
54  
55  
56  
57  
58  
59  
60
11. Maurer H, Masterson S, Tjelmeland IB, et al. When is a bystander not a bystander any more? A European survey. *Resuscitation* 2019;136:78-84. doi: 10.1016/j.resuscitation.2018.12.009 [published Online First: 2018/12/21]
12. Tjelmeland IBM, Masterson S, Herlitz J, et al. Description of Emergency Medical Services, treatment of cardiac arrest patients and cardiac arrest registries in Europe. *Scand J Trauma Resusc Emerg Med* 2020;28(1):103. doi: 10.1186/s13049-020-00798-7 [published Online First: 2020/10/21]
13. Roessler M, Zuzan O. EMS systems in Germany. *Resuscitation* 2006;68(1):45-9. doi: 10.1016/j.resuscitation.2005.08.004 [published Online First: 2006/01/13]
14. Grasner JT, Meybohm P, Lefering R, et al. ROSC after cardiac arrest--the RACA score to predict outcome after out-of-hospital cardiac arrest. *European heart journal* 2011;32(13):1649-56. doi: 10.1093/eurheartj/ehr107 [published Online First: 2011/04/26]
15. Seewald S, Wnent J, Lefering R, et al. CaRdiac Arrest Survival Score (CRASS) - A tool to predict good neurological outcome after out-of-hospital cardiac arrest. *Resuscitation* 2020;146:66-73. doi: 10.1016/j.resuscitation.2019.10.036 [published Online First: 2019/11/16]

- 1  
2  
3  
4 16. Fischer M, Wnent J, Gräsner JT, et al. Jahresbericht des Deutschen Reanimationsregisters  
5  
6  
7 – Außerklinische Reanimation 2019. *Anästh Intensivmed* 2020(61):89-93.  
8  
9
- 10 17. Tjelmeland IBM, Alm-Kruse K, Andersson LJ, et al. Cardiac arrest as a reportable  
11  
12  
13 condition: a cohort study of the first 6 years of the Norwegian out-of-hospital cardiac  
14  
15  
16 arrest registry. *BMJ Open* 2020;10(7):e038133. doi: 10.1136/bmjopen-2020-038133  
17  
18  
19 [published Online First: 2020/07/10]  
20  
21  
22
- 23 18. von Elm E, Altman DG, Egger M, et al. Strengthening the Reporting of Observational  
24  
25  
26 Studies in Epidemiology (STROBE) statement: guidelines for reporting observational  
27  
28  
29 studies. *BMJ* 2007;335(7624):806-8. doi: 10.1136/bmj.39335.541782.AD [published  
30  
31  
32 Online First: 2007/10/20]  
33  
34  
35
- 36 19. Jacobs I, Nadkarni V, Bahr J, et al. Cardiac arrest and cardiopulmonary resuscitation  
37  
38  
39 outcome reports: update and simplification of the Utstein templates for resuscitation  
40  
41  
42 registries: a statement for healthcare professionals from a task force of the  
43  
44  
45 International Liaison Committee on Resuscitation (American Heart Association,  
46  
47  
48 European Resuscitation Council, Australian Resuscitation Council, New Zealand  
49  
50  
51 Resuscitation Council, Heart and Stroke Foundation of Canada, InterAmerican Heart  
52  
53  
54 Resuscitation Council, Heart and Stroke Foundation of Canada, InterAmerican Heart  
55  
56  
57 Foundation, Resuscitation Councils of Southern Africa). *Circulation*  
58  
59  
60

2004;110(21):3385-97. doi: 110/21/3385 [pii]10.1161/01.CIR.0000147236.85306.15

[published Online First: 2004/11/24]

20. Stromsoe A, Svensson L, Axelsson AB, et al. Validity of reported data in the Swedish Cardiac Arrest Register in selected parts in Sweden. *Resuscitation* 2013;84(7):952-6. doi: 10.1016/j.resuscitation.2012.12.026 [published Online First: 2013/01/15]
21. Becker LB, Smith DW, Rhodes KV. Incidence of cardiac arrest: a neglected factor in evaluating survival rates. *Ann Emerg Med* 1993;22(1):86-91. doi: 10.1016/s0196-0644(05)80257-4 [published Online First: 1993/01/01]
22. Statistical Office of the European Communities. Cardiovascular diseases statistics. Deaths from cardiovascular diseases. In: Eurostat, ed. European Commission's statistical office. [https://ec.europa.eu/eurostat/statistics-explained/index.php?title=Cardiovascular diseases statistics#Deaths from cardiovascular diseases](https://ec.europa.eu/eurostat/statistics-explained/index.php?title=Cardiovascular_diseases_statistics#Deaths_from_cardiovascular_diseases): Eurostat, 1990.
23. Nolan JP, Soar J, Cariou A, et al. European Resuscitation Council and European Society of Intensive Care Medicine Guidelines for Post-resuscitation Care 2015: Section 5 of the European Resuscitation Council Guidelines for Resuscitation 2015. *Resuscitation*

2015;95:202-22. doi: 10.1016/j.resuscitation.2015.07.018 [published Online First: 2015/10/20]

24. Holmen J, Herlitz J, Ricksten SE, et al. Shortening Ambulance Response Time Increases Survival in Out-of-Hospital Cardiac Arrest. *J Am Heart Assoc* 2020;9(21):e017048.

doi: 10.1161/JAHA.120.017048 [published Online First: 2020/10/28]

25. Burger A, Wnent J, Bohn A, et al. The Effect of Ambulance Response Time on Survival Following Out-of-Hospital Cardiac Arrest. *Dtsch Arztebl Int* 2018;115(33-34):541-48.

doi: 10.3238/arztebl.2018.0541 [published Online First: 2018/09/08]

26. Lim SL, Smith K, Dyson K, et al. Incidence and Outcomes of Out-of-Hospital Cardiac Arrest in Singapore and Victoria: A Collaborative Study. *J Am Heart Assoc*

2020;9(21):e015981. doi: 10.1161/JAHA.119.015981 [published Online First:

2020/10/24]

27. Nasjonalt Servicemiljø for Medisinske Kvalitetsregistre. Resultat fra medisinske kvalitetsregistre (Results from medical quality registries) [Online]. SKDE; 2021 [cited

2021 12.01.2021]. Webpage where results from all approved national medical quality registries are published]. Available from: <https://www.kvalitetsregistre.no> accessed

12.01.2021 2021.



1  
2  
3  
4 28. Rott N, Scholz KH, Busch HJ, et al. Cardiac Arrest Center Certification for out-of-  
5  
6  
7 hospital cardiac arrest patients successfully established in Germany. *Resuscitation*  
8  
9  
10 2020;156:1-3. doi: 10.1016/j.resuscitation.2020.08.007 [published Online First:  
11  
12  
13 2020/08/30]

14  
15  
16  
17 29. Perkins GD, Graesner JT, Semeraro F, et al. European Resuscitation Council Guidelines  
18  
19  
20 2021: Executive summary. *Resuscitation* 2021;161:1-60. doi:  
21  
22  
23 10.1016/j.resuscitation.2021.02.003 [published Online First: 2021/03/29]  
24  
25  
26  
27  
28  
29  
30  
31  
32  
33  
34  
35  
36  
37  
38  
39  
40  
41  
42  
43  
44  
45  
46  
47  
48  
49  
50  
51  
52  
53  
54  
55  
56  
57  
58  
59  
60

## LEGEND TO FIGURES

*Figure 1: Flow of patients in the German Resuscitation Registry.*

*Figure 2: Flow of patients in the Norwegian Cardiac Arrest Registry.*

*Figure 3: Incidence per 100,000 inhabitants of patients treated with CPR by a bystander or EMS included in the German and the Norwegian cardiac arrest registries between 2015 and 2019. CPR - cardiopulmonary resuscitation, EMS – emergency medical personnel, ROSC – return of spontaneous circulation.*

*Figure 4: Incidence per 100,000 inhabitants in the Utstein comparator. Utstein comparator group - cardiac arrest witnessed by a bystander and having a shockable rhythm, ROSC – return of spontaneous circulation.*

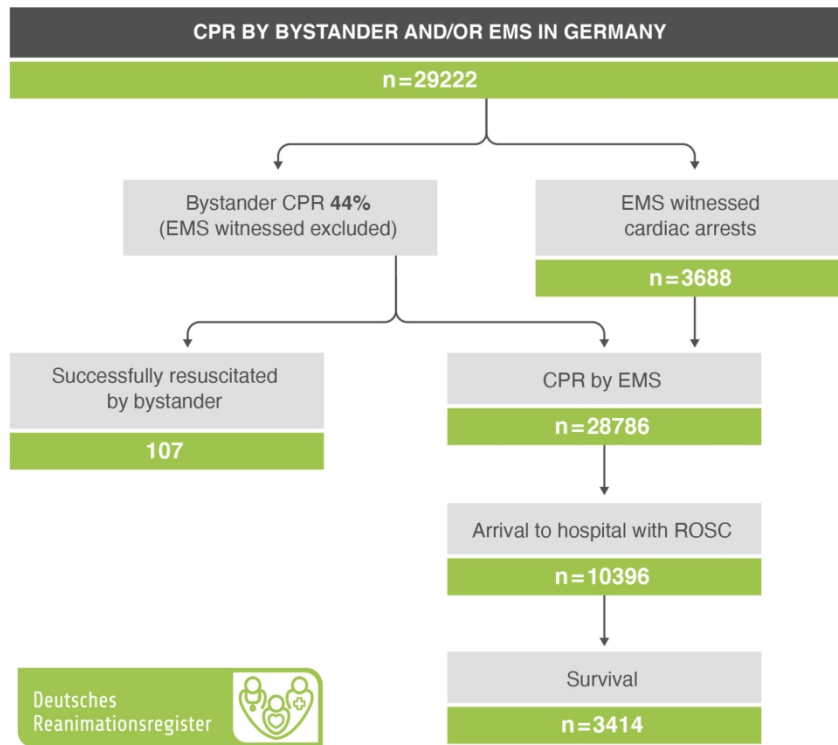

Figure 1: Flow of patients in the German Resuscitation Registry

139x121mm (300 x 300 DPI)

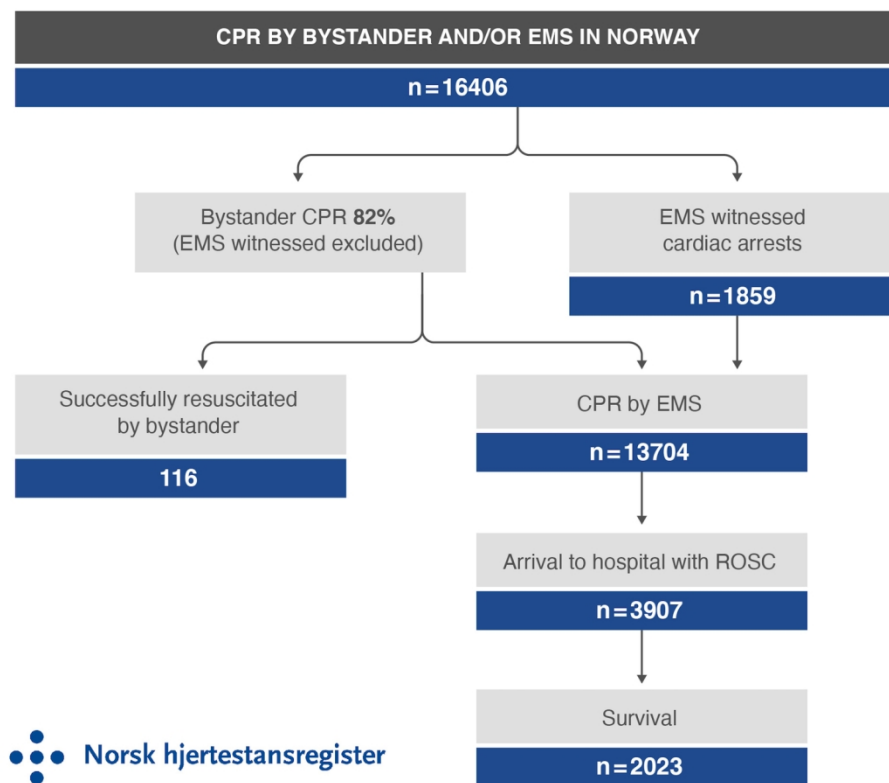

Figure 2: Flow of patients in the Norwegian Cardiac Arrest Registry.

139x127mm (300 x 300 DPI)

1  
2  
3  
4  
5  
6  
7  
8  
9  
10  
11  
12  
13  
14  
15  
16  
17  
18  
19  
20  
21  
22  
23  
24  
25  
26  
27  
28  
29  
30  
31  
32  
33  
34  
35  
36  
37  
38  
39  
40  
41  
42  
43  
44  
45  
46  
47  
48  
49  
50  
51  
52  
53  
54  
55  
56  
57  
58  
59  
60

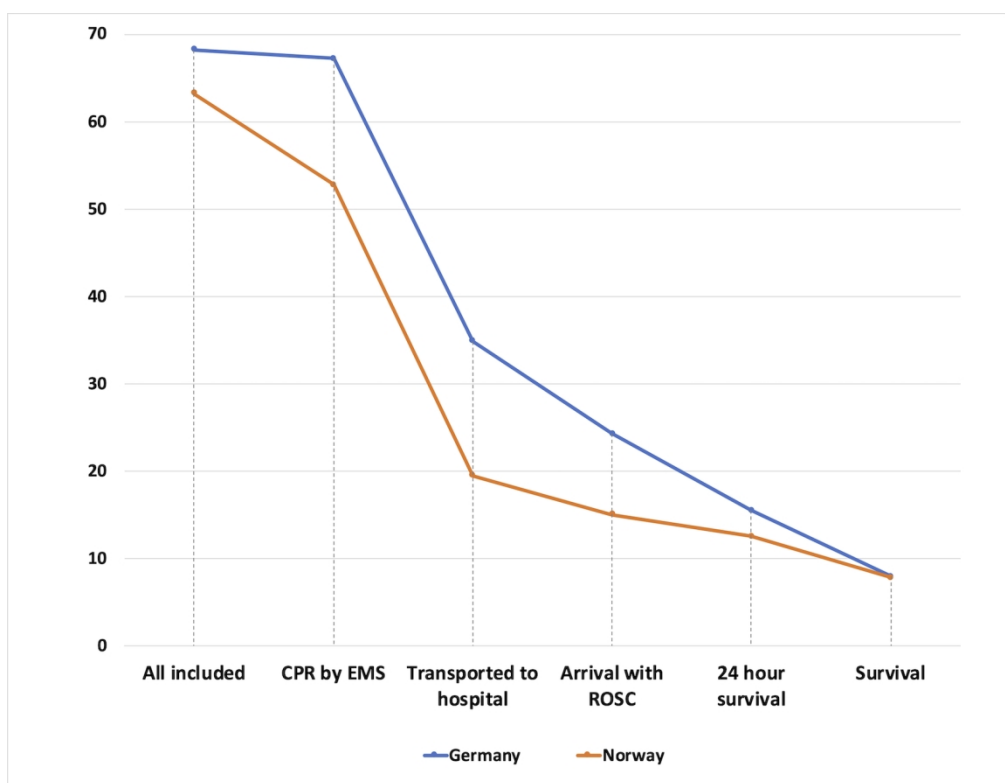

Figure 3: Incidence per 100,000 inhabitants of patients treated with CPR by a bystander or EMS included in the German and the Norwegian cardiac arrest registries between 2015 and 2019. CPR - cardiopulmonary resuscitation, EMS - emergency medical personnel, ROSC - return of spontaneous circulation.

150x116mm (300 x 300 DPI)

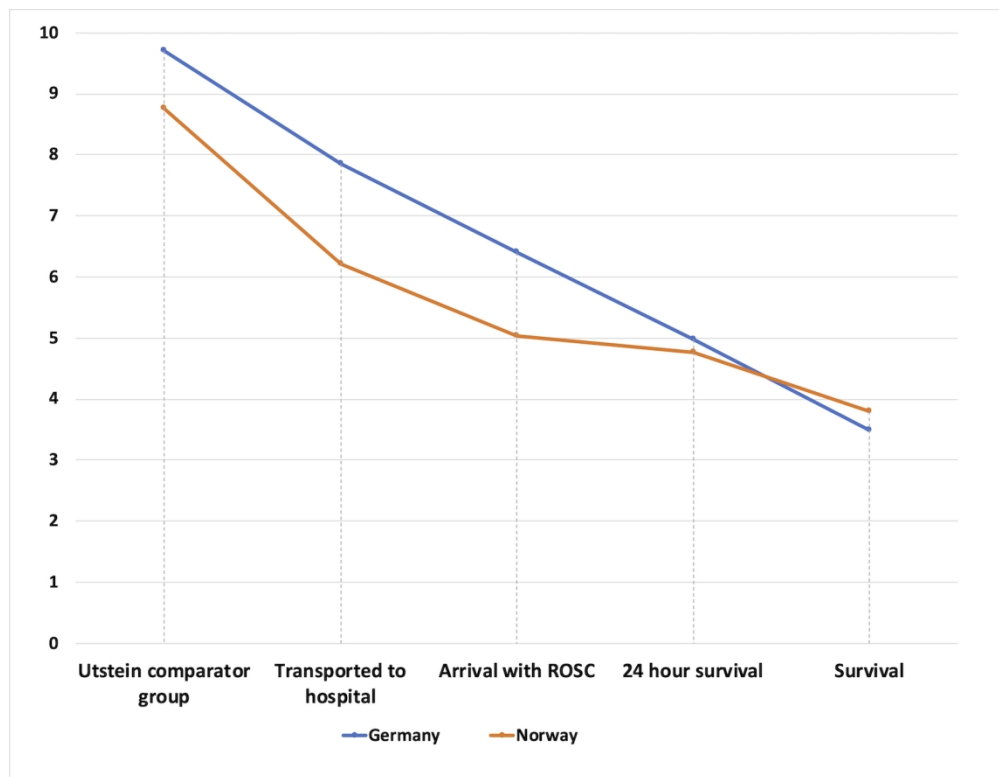

Figure 4: Incidence per 100,000 inhabitants in the Utstein comparator. Utstein comparator group - cardiac arrest witnessed by a bystander and having a shockable rhythm, ROSC – return of spontaneous circulation.

150x115mm (300 x 300 DPI)

# Reporting checklist for cross sectional study.

|                            | Reporting Item                                                                                                                                                                                                                                                                          | Page Number                     |
|----------------------------|-----------------------------------------------------------------------------------------------------------------------------------------------------------------------------------------------------------------------------------------------------------------------------------------|---------------------------------|
| <b>Title and abstract</b>  |                                                                                                                                                                                                                                                                                         |                                 |
| Title                      | <a href="#">#1a</a> Indicate the study's design with a commonly used term in the title or the abstract                                                                                                                                                                                  | 1                               |
| Abstract                   | <a href="#">#1b</a> Provide in the abstract an informative and balanced summary of what was done and what was found                                                                                                                                                                     | 3                               |
| <b>Introduction</b>        |                                                                                                                                                                                                                                                                                         |                                 |
| Background / rationale     | <a href="#">#2</a> Explain the scientific background and rationale for the investigation being reported                                                                                                                                                                                 | 5                               |
| Objectives                 | <a href="#">#3</a> State specific objectives, including any prespecified hypotheses                                                                                                                                                                                                     | 5                               |
| <b>Methods</b>             |                                                                                                                                                                                                                                                                                         |                                 |
| Study design               | <a href="#">#4</a> Present key elements of study design early in the paper                                                                                                                                                                                                              | 5                               |
| Setting                    | <a href="#">#5</a> Describe the setting, locations, and relevant dates, including periods of recruitment, exposure, follow-up, and data collection                                                                                                                                      | 6-10                            |
| Eligibility criteria       | <a href="#">#6a</a> Give the eligibility criteria, and the sources and methods of selection of participants.                                                                                                                                                                            | 9                               |
|                            | <a href="#">#7</a> Clearly define all outcomes, exposures, predictors, potential confounders, and effect modifiers. Give diagnostic criteria, if applicable                                                                                                                             | 9                               |
| Data sources / measurement | <a href="#">#8</a> For each variable of interest give sources of data and details of methods of assessment (measurement). Describe comparability of assessment methods if there is more than one group. Give information separately for for exposed and unexposed groups if applicable. | 8-9                             |
| Bias                       | <a href="#">#9</a> Describe any efforts to address potential sources of bias                                                                                                                                                                                                            | 16                              |
| Study size                 | <a href="#">#10</a> Explain how the study size was arrived at                                                                                                                                                                                                                           | n/a, all patients were included |

|    |                  |                      |                                                                   |               |
|----|------------------|----------------------|-------------------------------------------------------------------|---------------|
| 1  | Quantitative     | <a href="#">#11</a>  | Explain how quantitative variables were handled in the            | 10-11         |
| 2  | variables        |                      | analyses. If applicable, describe which groupings were chosen,    |               |
| 3  |                  |                      | and why                                                           |               |
| 4  |                  |                      |                                                                   |               |
| 5  |                  |                      |                                                                   |               |
| 6  | Statistical      | <a href="#">#12a</a> | Describe all statistical methods, including those used to control | 10-11         |
| 7  | methods          |                      | for confounding                                                   |               |
| 8  |                  |                      |                                                                   |               |
| 9  |                  |                      |                                                                   |               |
| 10 | Statistical      | <a href="#">#12b</a> | Describe any methods used to examine subgroups and                | 10-11         |
| 11 | methods          |                      | interactions                                                      |               |
| 12 |                  |                      |                                                                   |               |
| 13 |                  |                      |                                                                   |               |
| 14 | Statistical      | <a href="#">#12c</a> | Explain how missing data were addressed                           | n/a missing   |
| 15 | methods          |                      |                                                                   | variables are |
| 16 |                  |                      |                                                                   | reported in   |
| 17 |                  |                      |                                                                   | tables        |
| 18 |                  |                      |                                                                   |               |
| 19 |                  |                      |                                                                   |               |
| 20 |                  |                      |                                                                   |               |
| 21 | Statistical      | <a href="#">#12d</a> | If applicable, describe analytical methods taking account of      | n/a           |
| 22 | methods          |                      | sampling strategy                                                 |               |
| 23 |                  |                      |                                                                   |               |
| 24 | Statistical      | <a href="#">#12e</a> | Describe any sensitivity analyses                                 | n/a           |
| 25 | methods          |                      |                                                                   |               |
| 26 |                  |                      |                                                                   |               |
| 27 |                  |                      |                                                                   |               |
| 28 | <b>Results</b>   |                      |                                                                   |               |
| 29 |                  |                      |                                                                   |               |
| 30 |                  |                      |                                                                   |               |
| 31 | Participants     | <a href="#">#13a</a> | Report numbers of individuals at each stage of study—eg           | Table 1-4     |
| 32 |                  |                      | numbers potentially eligible, examined for eligibility, confirmed |               |
| 33 |                  |                      | eligible, included in the study, completing follow-up, and        |               |
| 34 |                  |                      | analysed. Give information separately for for exposed and         |               |
| 35 |                  |                      | unexposed groups if applicable.                                   |               |
| 36 |                  |                      |                                                                   |               |
| 37 |                  |                      |                                                                   |               |
| 38 |                  |                      |                                                                   |               |
| 39 | Participants     | <a href="#">#13b</a> | Give reasons for non-participation at each stage                  | n/a           |
| 40 |                  |                      |                                                                   |               |
| 41 | Participants     | <a href="#">#13c</a> | Consider use of a flow diagram                                    | Figure 1a and |
| 42 |                  |                      |                                                                   | b             |
| 43 |                  |                      |                                                                   |               |
| 44 |                  |                      |                                                                   |               |
| 45 | Descriptive data | <a href="#">#14a</a> | Give characteristics of study participants (eg demographic,       | 11, Table 1   |
| 46 |                  |                      | clinical, social) and information on exposures and potential      |               |
| 47 |                  |                      | confounders. Give information separately for exposed and          |               |
| 48 |                  |                      | unexposed groups if applicable.                                   |               |
| 49 |                  |                      |                                                                   |               |
| 50 |                  |                      |                                                                   |               |
| 51 |                  |                      |                                                                   |               |
| 52 | Descriptive data | <a href="#">#14b</a> | Indicate number of participants with missing data for each        | Table 1-4     |
| 53 |                  |                      | variable of interest                                              |               |
| 54 |                  |                      |                                                                   |               |
| 55 |                  |                      |                                                                   |               |
| 56 |                  |                      |                                                                   |               |
| 57 |                  |                      |                                                                   |               |
| 58 |                  |                      |                                                                   |               |
| 59 |                  |                      |                                                                   |               |
| 60 |                  |                      |                                                                   |               |



|    |                    |                      |                                                                                                                                                                                                          |           |
|----|--------------------|----------------------|----------------------------------------------------------------------------------------------------------------------------------------------------------------------------------------------------------|-----------|
| 1  | Outcome data       | <a href="#">#15</a>  | Report numbers of outcome events or summary measures. Give information separately for exposed and unexposed groups if applicable.                                                                        | Table 1-4 |
| 2  |                    |                      |                                                                                                                                                                                                          |           |
| 3  |                    |                      |                                                                                                                                                                                                          |           |
| 4  |                    |                      |                                                                                                                                                                                                          |           |
| 5  |                    |                      |                                                                                                                                                                                                          |           |
| 6  | Main results       | <a href="#">#16a</a> | Give unadjusted estimates and, if applicable, confounder-adjusted estimates and their precision (eg, 95% confidence interval). Make clear which confounders were adjusted for and why they were included | n/a       |
| 7  |                    |                      |                                                                                                                                                                                                          |           |
| 8  |                    |                      |                                                                                                                                                                                                          |           |
| 9  |                    |                      |                                                                                                                                                                                                          |           |
| 10 |                    |                      |                                                                                                                                                                                                          |           |
| 11 |                    |                      |                                                                                                                                                                                                          |           |
| 12 |                    |                      |                                                                                                                                                                                                          |           |
| 13 | Main results       | <a href="#">#16b</a> | Report category boundaries when continuous variables were categorized                                                                                                                                    | n/a       |
| 14 |                    |                      |                                                                                                                                                                                                          |           |
| 15 |                    |                      |                                                                                                                                                                                                          |           |
| 16 |                    |                      |                                                                                                                                                                                                          |           |
| 17 | Main results       | <a href="#">#16c</a> | If relevant, consider translating estimates of relative risk into absolute risk for a meaningful time period                                                                                             | n/a       |
| 18 |                    |                      |                                                                                                                                                                                                          |           |
| 19 |                    |                      |                                                                                                                                                                                                          |           |
| 20 |                    |                      |                                                                                                                                                                                                          |           |
| 21 | Other analyses     | <a href="#">#17</a>  | Report other analyses done—e.g., analyses of subgroups and interactions, and sensitivity analyses                                                                                                        | Table 2-4 |
| 22 |                    |                      |                                                                                                                                                                                                          |           |
| 23 |                    |                      |                                                                                                                                                                                                          |           |
| 24 |                    |                      |                                                                                                                                                                                                          |           |
| 25 | <b>Discussion</b>  |                      |                                                                                                                                                                                                          |           |
| 26 |                    |                      |                                                                                                                                                                                                          |           |
| 27 | Key results        | <a href="#">#18</a>  | Summarise key results with reference to study objectives                                                                                                                                                 | 16        |
| 28 |                    |                      |                                                                                                                                                                                                          |           |
| 29 | Limitations        | <a href="#">#19</a>  | Discuss limitations of the study, taking into account sources of potential bias or imprecision. Discuss both direction and magnitude of any potential bias.                                              | 16-17     |
| 30 |                    |                      |                                                                                                                                                                                                          |           |
| 31 |                    |                      |                                                                                                                                                                                                          |           |
| 32 |                    |                      |                                                                                                                                                                                                          |           |
| 33 |                    |                      |                                                                                                                                                                                                          |           |
| 34 | Interpretation     | <a href="#">#20</a>  | Give a cautious overall interpretation considering objectives, limitations, multiplicity of analyses, results from similar studies, and other relevant evidence.                                         | 17-19     |
| 35 |                    |                      |                                                                                                                                                                                                          |           |
| 36 |                    |                      |                                                                                                                                                                                                          |           |
| 37 |                    |                      |                                                                                                                                                                                                          |           |
| 38 |                    |                      |                                                                                                                                                                                                          |           |
| 39 |                    |                      |                                                                                                                                                                                                          |           |
| 40 | Generalisability   | <a href="#">#21</a>  | Discuss the generalisability (external validity) of the study results                                                                                                                                    | 18-20     |
| 41 |                    |                      |                                                                                                                                                                                                          |           |
| 42 |                    |                      |                                                                                                                                                                                                          |           |
| 43 |                    |                      |                                                                                                                                                                                                          |           |
| 44 | <b>Other</b>       |                      |                                                                                                                                                                                                          |           |
| 45 | <b>Information</b> |                      |                                                                                                                                                                                                          |           |
| 46 |                    |                      |                                                                                                                                                                                                          |           |
| 47 | Funding            | <a href="#">#22</a>  | Give the source of funding and the role of the funders for the present study and, if applicable, for the original study on which the present article is based                                            | 21        |
| 48 |                    |                      |                                                                                                                                                                                                          |           |
| 49 |                    |                      |                                                                                                                                                                                                          |           |
| 50 |                    |                      |                                                                                                                                                                                                          |           |
| 51 |                    |                      |                                                                                                                                                                                                          |           |
| 52 |                    |                      |                                                                                                                                                                                                          |           |

None The STROBE checklist is distributed under the terms of the Creative Commons Attribution License CC-BY. This checklist can be completed online using <https://www.goodreports.org/>, a tool made by the [EQUATOR Network](#) in collaboration with [Penelope.ai](#)

# BMJ Open

## THE IMPORTANCE OF REPORTING SURVIVAL AS INCIDENCE A CROSS-SECTIONAL COMPARATIVE STUDY ON OUT-OF- HOSPITAL CARDIAC ARREST REGISTRY DATA FROM GERMANY AND NORWAY

|                                 |                                                                                                                                                                                                                                                                                                                                                                                                                                                                                                                                                                                                                                                                                                                                                                                                                                                                                                                                                                                                                                                                                                                                                                                                                                                                                         |
|---------------------------------|-----------------------------------------------------------------------------------------------------------------------------------------------------------------------------------------------------------------------------------------------------------------------------------------------------------------------------------------------------------------------------------------------------------------------------------------------------------------------------------------------------------------------------------------------------------------------------------------------------------------------------------------------------------------------------------------------------------------------------------------------------------------------------------------------------------------------------------------------------------------------------------------------------------------------------------------------------------------------------------------------------------------------------------------------------------------------------------------------------------------------------------------------------------------------------------------------------------------------------------------------------------------------------------------|
| Journal:                        | <i>BMJ Open</i>                                                                                                                                                                                                                                                                                                                                                                                                                                                                                                                                                                                                                                                                                                                                                                                                                                                                                                                                                                                                                                                                                                                                                                                                                                                                         |
| Manuscript ID                   | bmjopen-2021-058381.R1                                                                                                                                                                                                                                                                                                                                                                                                                                                                                                                                                                                                                                                                                                                                                                                                                                                                                                                                                                                                                                                                                                                                                                                                                                                                  |
| Article Type:                   | Original research                                                                                                                                                                                                                                                                                                                                                                                                                                                                                                                                                                                                                                                                                                                                                                                                                                                                                                                                                                                                                                                                                                                                                                                                                                                                       |
| Date Submitted by the Author:   | 18-Jan-2022                                                                                                                                                                                                                                                                                                                                                                                                                                                                                                                                                                                                                                                                                                                                                                                                                                                                                                                                                                                                                                                                                                                                                                                                                                                                             |
| Complete List of Authors:       | Tjelmeland, Ingvild Beathe; Universitätsklinikum Schleswig-Holstein, Institute for Emergency Medicine; University of Oslo, Faculty of Medicine and Oslo University Hospital<br>Alm-Kruse, Kristin; Oslo University Hospital, Division of Emergencies and Critical Care; University of Oslo Faculty of Medicine,<br>Grasner, Jan-Thorsten; Universitätsklinikum Schleswig-Holstein, Institute for Emergency Medicine; Universitätsklinikum Schleswig-Holstein, Department of Anaesthesiology and Intensive Care Medicine<br>Isern, Cecilie Benedicte; University of Oslo, Faculty of Medicine; Oslo University Hospital, Division of Prehospital Services<br>Jakisch, Barbara; imland gGmbH<br>Kramer-Johansen, Jo; Universitetet i Oslo Institutt for klinisk medisin, Faculty of Medicine; Oslo University Hospital, Division of Prehospital Services<br>Renzing, Niels; University Hospital Schleswig Holstein, Institute for Emergency Medicine<br>Wnent, Jan; Universitätsklinikum Schleswig-Holstein, Institute for Emergency Medicine; University of Namibia School of Medicine<br>Seewald, Stephan; Universitätsklinikum Schleswig-Holstein, Institute for Emergency Medicine; University Hospital Schleswig Holstein, Department of Anaesthesiology and Intensive Care Medicine |
| <b>Primary Subject Heading</b>: | Epidemiology                                                                                                                                                                                                                                                                                                                                                                                                                                                                                                                                                                                                                                                                                                                                                                                                                                                                                                                                                                                                                                                                                                                                                                                                                                                                            |
| Secondary Subject Heading:      | Cardiovascular medicine, Emergency medicine, Public health                                                                                                                                                                                                                                                                                                                                                                                                                                                                                                                                                                                                                                                                                                                                                                                                                                                                                                                                                                                                                                                                                                                                                                                                                              |
| Keywords:                       | Cardiac Epidemiology < CARDIOLOGY, EPIDEMIOLOGY, PUBLIC HEALTH, Quality in health care < HEALTH SERVICES ADMINISTRATION & MANAGEMENT                                                                                                                                                                                                                                                                                                                                                                                                                                                                                                                                                                                                                                                                                                                                                                                                                                                                                                                                                                                                                                                                                                                                                    |
|                                 |                                                                                                                                                                                                                                                                                                                                                                                                                                                                                                                                                                                                                                                                                                                                                                                                                                                                                                                                                                                                                                                                                                                                                                                                                                                                                         |

SCHOLARONE™  
Manuscripts

1  
2  
3  
4  
5  
6  
7  
8  
9  
10  
11  
12  
13  
14  
15  
16  
17  
18  
19  
20  
21  
22  
23  
24  
25  
26  
27  
28  
29  
30  
31  
32  
33  
34  
35  
36  
37  
38  
39  
40  
41  
42  
43  
44  
45  
46  
47  
48  
49  
50  
51  
52  
53  
54  
55  
56  
57  
58  
59  
60



I, the Submitting Author has the right to grant and does grant on behalf of all authors of the Work (as defined in the below author licence), an exclusive licence and/or a non-exclusive licence for contributions from authors who are: i) UK Crown employees; ii) where BMJ has agreed a CC-BY licence shall apply, and/or iii) in accordance with the terms applicable for US Federal Government officers or employees acting as part of their official duties; on a worldwide, perpetual, irrevocable, royalty-free basis to BMJ Publishing Group Ltd ("BMJ") its licensees and where the relevant Journal is co-owned by BMJ to the co-owners of the Journal, to publish the Work in this journal and any other BMJ products and to exploit all rights, as set out in our [licence](#).

The Submitting Author accepts and understands that any supply made under these terms is made by BMJ to the Submitting Author unless you are acting as an employee on behalf of your employer or a postgraduate student of an affiliated institution which is paying any applicable article publishing charge ("APC") for Open Access articles. Where the Submitting Author wishes to make the Work available on an Open Access basis (and intends to pay the relevant APC), the terms of reuse of such Open Access shall be governed by a Creative Commons licence – details of these licences and which [Creative Commons](#) licence will apply to this Work are set out in our licence referred to above.

Other than as permitted in any relevant BMJ Author's Self Archiving Policies, I confirm this Work has not been accepted for publication elsewhere, is not being considered for publication elsewhere and does not duplicate material already published. I confirm all authors consent to publication of this Work and authorise the granting of this licence.

# THE IMPORTANCE OF REPORTING SURVIVAL AS INCIDENCE

## A CROSS-SECTIONAL COMPARATIVE STUDY ON OUT-OF-HOSPITAL CARDIAC

### ARREST REGISTRY DATA FROM GERMANY AND NORWAY

Ingvild Tjelmeland <sup>1,2,3</sup>, Kristin Alm-Kruse <sup>2,4</sup>, Jan-Thorsten Gräsner <sup>1,5</sup>, Cecilie Benedicte

Isern <sup>2,3</sup>, Barbara Jakisch <sup>6</sup>, Jo Kramer-Johansen <sup>2,3</sup>, Niels Renzing <sup>1</sup>, Jan Wnent <sup>1,5,7</sup>, Stephan

Seewald <sup>1,5</sup>

1. University Hospital Schleswig-Holstein, Institute for Emergency Medicine, Kiel, Germany
2. Faculty of Medicine, Institute of Clinical Medicine, University of Oslo, Norway
3. Division of Prehospital Services, Oslo University Hospital, Norway
4. Dep of Research & Development, Division of Emergencies and Critical Care, Oslo University Hospital, Norway
5. University Hospital Schleswig-Holstein, Department of Anaesthesiology and Intensive Care Medicine, Kiel, Germany
6. Imland gGmbH, Rendsburg, Germany
7. University of Namibia, School of Medicine, Windhoek, Namibia

#### **Corresponding author**

Ingvild Tjelmeland

Oslo University Hospital,

1

1  
2  
3 Kirkeveien 166, 0424 Oslo  
4

5 Email: ingvild@nakos.no  
6

7 Telephone: +4795801490  
8  
9

10  
11  
12 Word count abstract: 285  
13

14 Word count: 3359  
15  
16

17  
18  
19  
20  
21  
22  
23  
24  
25  
26  
27  
28  
29  
30  
31  
32  
33  
34  
35  
36  
37  
38  
39  
40  
41  
42  
43  
44  
45  
46  
47  
48  
49  
50  
51  
52  
53  
54  
55  
56  
57  
58  
59  
60

For peer review only

2

## ABSTRACT

**Objectives:** Health registries are a unique source of information about current practice and can describe disease burden in a population. We aimed to understand similarities and differences in the German Resuscitation Registry (GRR) and the Norwegian Cardiac Arrest Registry (NorCAR) and compare incidence and survival for patients resuscitated after out-of-hospital cardiac arrest.

**Design:** A cross-sectional comparative analysis reporting incidence and outcome on a population level.

**Setting:** We included data from the cardiac arrest registries in Germany and Norway.

**Participants:** Patients resuscitated between 1<sup>st</sup> January 2015 and 31<sup>st</sup> December 2019 were included, resulting in 29,222 cases from GRR and 16,406 cases from NorCAR. From GRR, only emergency medical services (EMS) reporting survival information for patients admitted to hospital were included.

**Primary and secondary outcome measures:** This study focused on the EMS systems, the registries, and the patients included in both registries. The results compare the total incidence, incidence of patients resuscitated by EMS and the incidence of survival.

**Results:** We found an incidence of 68 per 100,000 inhabitants in GRR and 63 in NorCAR. The incidence of patients treated by EMS was 67 in GRR and 53 in NorCAR. The incidence of patients arriving at a hospital was higher in GRR (24.3) than in NorCAR (15.1), but survival was similar (8 in GRR and 7.8 in NorCAR).

**Conclusion:** GRR is a voluntary registry, and in-hospital information is not reported for all cases. NorCAR has mandatory reporting from all EMS and hospitals. EMS in Germany starts treatment on more patients and bring a higher number to hospital, but we found no difference

1  
2  
3 in the incidence of survival. This study has improved our knowledge of both registries and  
4  
5 highlighted the importance of reporting survival as incidence when comparing registries.  
6  
7  
8  
9

### 10 **Keywords:**

11  
12 cardiac arrest, registry, reporting, cohort study, incidence survival  
13  
14  
15  
16  
17

## 18 **ARTICLE SUMMARY**

### 19 **Strengths and limitations of this study:**

- 20  
21  
22  
23 • Prospective cardiac arrest registries provide knowledge about treatment and results in  
24  
25 real life in contrast to highly selected populations in clinical studies.  
26  
27
- 28 • We used data from a mandatory registry covering an entire country and from a  
29  
30 voluntary registry covering parts of a country.  
31  
32
- 33 • We use incidence per 100,000 inhabitants when presenting the rate of cases and the  
34  
35 rate of survival in the out-of-hospital cardiac arrest population.  
36  
37
- 38 • In Germany, the General Data Protection Regulation interpretation is associated with  
39  
40 more missing information on survival status than results from the Norwegian registry.  
41  
42  
43  
44  
45  
46  
47  
48  
49  
50  
51  
52  
53  
54  
55  
56  
57  
58  
59  
60



## INTRODUCTION

Health registries are a unique source of information about current practice and the first of many steps in improving treatment and care<sup>1</sup>. Registries can be used for epidemiological and outcome reports for many health conditions, describe the burden of disease and the effectiveness of treatment. Registries can also be beneficial in quality improvement projects,<sup>2</sup> and for political accountability. Registries on out-of-hospital cardiac arrest (OHCA) are of particular interest as a successful outcome depends on a complex chain involving the population, medical dispatch, emergency medical services and hospital treatment<sup>3</sup>.

For a society to improve survival after OHCA, detailed and reliable data must guide our efforts. Several studies and reviews have compared outcomes across countries and jurisdictions<sup>4-8</sup>. Despite the international consensus of which data to collect and how to collect it,<sup>9</sup> results vary greatly, even within groups presumed to have similar characteristics<sup>10 11</sup>.

Survival is often reported as rates and not as incidence per 100,000 inhabitants, making comparisons almost impossible due to the varying denominator. Two big studies reporting on cardiac arrest in Europe both reported return of spontaneous circulation (ROSC) and survival as percentages and not as incidence.<sup>6 8</sup> The same use of percentages can be seen in the yearly reports from the Cardiac Arrest Registry to Enhance Survival (CARES) in USA<sup>12</sup> and the first report from the International Liaison Committee on Resuscitation.<sup>7</sup>

This study aimed to understand the German Resuscitation Registry (GRR) and the Norwegian Cardiac Arrest Registry (NorCAR), to compare the EMS systems in Germany and Norway,

1  
2  
3 and to report on the treatment given to patients suffering out-of-hospital cardiac arrest. We  
4  
5 also aimed to compare a mandatory and a voluntary registry, the incidence of included  
6  
7 patients, and incidence of survival. As a background for our analysis, we describe the care  
8  
9 provided to OHCA patients and data collection into the registries. We present incidence and  
10  
11 outcome in the catchment areas and the Utstein comparator group (witnessed by a bystander  
12  
13 and having a shockable rhythm)<sup>9</sup>.  
14  
15  
16  
17  
18  
19

## 20 21 **METHODS**

### 22 23 **Healthcare in Germany**

24  
25 Germany is a federal parliamentary republic consisting of 16 states and covers 357,386 square  
26  
27 kilometres (km<sup>2</sup>). In 2019 Germany had 85 million inhabitants. The population density was  
28  
29 about 238 inhabitants per km<sup>2</sup> <sup>13</sup>.  
30  
31  
32  
33  
34

35 The emergency medical services (EMS) in Germany is a two-tiered system consisting of  
36  
37 emergency medical technicians (EMT) or paramedics and emergency-physician. Teaching  
38  
39 paramedics often have education on a bachelor level, but this is not common for paramedics  
40  
41 working in the field. Ambulances personnel provide primary care and patient transportation,  
42  
43 and a medical vehicle or helicopter carries an emergency physician to the patient location for  
44  
45 all cardiac arrest situations<sup>14</sup>.  
46  
47  
48  
49  
50

51 A standard emergency number, 1-1-2, terminates at an Emergency Medical Communications  
52  
53 Centres (EMCC). EMTs or paramedics are call-takers. Each state organises their specialist  
54  
55 health care, resulting in differences in the EMCCs. There are 1,900 hospitals with a 24/7  
56  
57

58  
59 6  
60

1  
2  
3 emergency department, resulting in 23 hospitals per 1 million inhabitants. Due to German  
4 data protection laws, using a single patient identification number in health care is not possible.  
5  
6 Health insurance or the state covers health care in Germany<sup>13</sup>.  
7  
8  
9

10  
11  
12 Hospitals with an internal medicine department and an emergency department treat patients  
13 that survive to hospital admission. Recently a unique certification for cardiac-arrest centres  
14 was established. To get certified, hospitals must fulfil criteria, including 24/7 Percutaneous  
15 Coronary Intervention (PCI) service and have protocols for post-cardiac arrest care.  
16  
17  
18  
19  
20  
21  
22

### 23 **Healthcare in Norway**

24  
25 Norway is a representative democratic constitutional monarchy covering a total land area of  
26 304,282 km<sup>2</sup> and had 5.3 million inhabitants in 2019. The population density is about 18  
27 inhabitants per km<sup>2</sup> <sup>13</sup>.  
28  
29  
30  
31  
32  
33

34  
35 The EMS in Norway consists of ambulances, boats and helicopters, search and rescue  
36 helicopters, small aeroplanes and physician-manned cars. The helicopters, planes and  
37 physician-manned cars have rescue-EMS personnel and an anesthesiologist/emergency  
38 physician. Ambulance personnel have an education level of minimum upper secondary school  
39 and a two-year apprenticeship. In recent years, several universities have established bachelor  
40 programs for paramedics.  
41  
42  
43  
44  
45  
46  
47  
48  
49

50  
51 The Norwegian single-payer public insurance covers all aspects of health care, including the  
52 ambulance service. For medical emergencies, there is a dedicated telephone number, 1-1-3,  
53 that terminates at 16 local EMCC. Nurses and ambulance personnel receive the calls.  
54  
55  
56  
57  
58  
59  
60

1  
2  
3 Specialist health care is organised in four regional and 19 local health trusts, with 50 hospitals  
4 with an emergency department, resulting in 9.4 hospitals per 1 million inhabitants<sup>13</sup>. Based on  
5 national recommendations, all hospitals have protocols for care for patients surviving to  
6 hospital admission. Within each region in Norway, referral hospitals offer 24/7 PCI, and  
7 bypass protocols are in place. A personal identification number identifies the patient in all  
8 contact with specialist health care.  
9  
10  
11  
12  
13  
14  
15  
16  
17  
18

### 19 **The German resuscitation registry (GRR)**

20  
21 GRR is a voluntary based registry established in 2007 by the German Society of  
22 Anaesthesiology and Intensive Care Medicine. In 2019, GRR received information from EMS  
23 covering 26.6 million inhabitants (31% of the inhabitants of Germany and with EMS from all  
24 parts of the country). The registry includes fully anonymised data from patients suffering  
25 cardiac arrest both outside and in the hospital. In addition to data collection and  
26 benchmarking, GRR provides risk adjustment analysis for its participants<sup>15 16</sup>.  
27  
28  
29  
30  
31  
32  
33  
34  
35  
36  
37

38 The inclusion criteria in GRR is; all EMS attended cardiac arrests. Participants in the registry  
39 enter information from the EMS services and may add in-hospital treatment, survival to  
40 hospital discharge, and 30-day survival if this information is available. Due to different  
41 interpretations of the General Data Protection Regulation (GDPR), in-hospital treatment of  
42 OHCA patients is not always available for the reporting EMS system. An area with good data  
43 quality has; an incidence above 30/100,000 inhabitants per year, ROSC in less than 80% of  
44 cases, information about ROSC-after-cardiac-arrest in more than 60% of the cases, and, if  
45 relevant, documented hospital care available for more than 30% of the cases<sup>17</sup>.  
46  
47  
48  
49  
50  
51  
52  
53  
54  
55  
56  
57  
58  
59  
60

## **The Norwegian Cardiac Arrest Registry (NorCAR)**

National Advisory Unit on Prehospital Emergency Medicine established NorCAR in 2002, and the registry received status as a mandatory national health registry in September 2013.

The registry includes cardiac arrests both outside and in the hospital. By May 2016, all health trusts reported OHCA to the registry. Oslo University Hospital hosts the registry, and the Norwegian Institute of Public Health has the legal responsibility<sup>18</sup>.

Inclusion criteria in the registry is; patients suffering cardiac arrest, where bystanders, first responders or healthcare professionals start any kind of treatment. Treatment is basic or advanced cardiopulmonary resuscitation (CPR) or defibrillation. Patients suffering cardiac arrest that do not receive any CPR are not included in the registry<sup>18</sup>.

### **Participants**

This study included all patients from NorCAR and all patients where resuscitation was attempted from areas in GRR with good data quality. The patients had a cardiac arrest between 1<sup>st</sup> January 2015 and 31<sup>st</sup> December 2019.

### **Variables**

All data variables in the registries are available in the local languages. Variables were translated into English to make comparison possible and to ensure an equal understanding of the definitions. Although both registries use the Utstein definitions, the German registry reports any ROSC while the Norwegian registry reports sustained ROSC (ROSC for more than 20 minutes or to hospital admission). Therefore, the shared data points “Transport to

1  
2  
3 hospital” and “Arrival to hospital with ROSC” was used. For the overall survival, we used  
4  
5 survival to hospital discharge in GRR and 30-day survival in NorCAR.  
6  
7  
8  
9

### 10 **Patient and Public Involvement**

11  
12 NorCARs steering committee has a user representative who has been actively involved in  
13  
14 planning this and earlier projects in NorCAR. He represents the patient organisation National  
15  
16 Association of Heart and Lung Disease (LHL) with 54,000 members. Through his network of  
17  
18 fellow user representatives, he provides a channel for communication to the patient population  
19  
20 and the boards of the health trusts. At several meetings, the user representative has expressed  
21  
22 concern regarding the difficulties of comparing data from different regions in Norway and  
23  
24 differences between countries. We believe this study addresses these challenges, and we also  
25  
26 suggest a method for reducing the reported differences by presenting results as incidence, not  
27  
28 at percentages.  
29  
30  
31  
32  
33  
34

### 35 **Checklist**

36  
37 The STROBE cross-sectional reporting guideline was used when formatting the manuscript<sup>19</sup>.  
38  
39  
40  
41  
42

## 43 **STATISTICAL METHODS**

44  
45  
46 We provide descriptive measures as mean with standard deviation (SD) or median, as  
47  
48 appropriate according to the data distribution. We calculated incidence for regions reporting  
49  
50 part of a year by dividing the number of patients by the corresponding fraction of the person-  
51  
52 years for that region. For bystander efforts (CPR and use of public defibrillators) and  
53  
54 calculation of EMS response intervals, we excluded EMS witnessed cardiac arrests. We  
55  
56  
57

58  
59 10  
60

1  
2  
3 analysed the Utstein comparator group based on the 2014 definition,<sup>9</sup> including patients with  
4 a bystander-witnessed collapse and an initial shockable rhythm. For the cause of arrest, we  
5 used the Utstein definition from 2004<sup>20</sup>. During several personal meetings, we reviewed the  
6 results and rechecked the analyses. Figures 1 and 2 describe the inclusion and exclusion of  
7 patients in GRR and NorCAR. Analyses were carried out using IBM SPSS Statistics 27. P-  
8 values are calculated based on the incidence, and a p-value <0.05 was considered statistically  
9 significant.  
10  
11  
12  
13  
14  
15  
16  
17  
18  
19  
20  
21  
22

## 23 RESULTS

### 24 Demographics

25  
26 Between 2015 and 2019, 29,222 cases were registered in GRR (68 per 100,000 inhabitants)  
27 and 16,406 cases in NorCAR (63 per 100,000 inhabitants). The patients in GRR were older  
28 than the patients in NorCAR, more often had presumed cardiac cause, had a shockable rhythm  
29 and were more likely to be unwitnessed (Table 1). Gender and the location of arrest were  
30 similar.  
31  
32  
33  
34  
35  
36  
37  
38  
39  
40  
41

42 *Table 1: Cardiac arrest characteristics for all resuscitated patients in GRR and NorCAR,*  
43 *2015-2019.*  
44  
45

| 46 All patients included in the analysis | 47 GRR        | 48 NorCAR     | 49 P-value |
|------------------------------------------|---------------|---------------|------------|
| 50                                       | 51 N = 29222  | 52 N = 16406  | 53         |
| 54 Incidence per 100,000 inhabitants     | 55 68.2       | 56 63.2       | 57 p<0.001 |
| 58 Age in years - Median (IQR)           | 59 73 (60-82) | 60 68 (54-79) | p<0.001    |
| Age in years – missing                   | 195           | 17            |            |

11

|                               |            |            |          |
|-------------------------------|------------|------------|----------|
| Male (%)                      | 19109 (65) | 10906 (66) | p=0.021  |
| Gender – missing              | 5          | -          |          |
| At home (%)                   | 18242 (62) | 10122 (62) | p=0.124  |
| Location - missing            | 151        | 98         |          |
| Presumed cardiac cause (%)    | 21793 (75) | 10990 (67) | p<0.001  |
| Initial rhythm shockable (%)  | 6753 (23)  | 3253 (20)  | p<0.001  |
| Initial rhythm – missing (%)  | 100 (<1)   | 2301 (14)  |          |
| Witnessed status (%)          |            |            | p<0.001  |
| Bystander witnessed (%)       | 12622 (43) | 8403 (51)  | p<0.001* |
| First-responder witnessed (%) | 399 (1)    | 11 (<1)    | p<0.001* |
| EMS witnessed (%)             | 3688 (13)  | 1861 (11)  | P=0.001* |
| CA not witnessed (%)          | 12455 (43) | 6124 (35)  | p<0.001* |
| CA witnessed – missing (%)    | 58 (<1)    | 7 (<1)     | p<0.001* |

GRR – German Resuscitation Registry – areas with good data quality, NorCAR – Norwegian Cardiac Arrest Registry, CPR – cardiopulmonary resuscitation, CA – cardiac arrest, EMS – emergency medical service. \* P-values from post hoc testing (chi-square test) and corrected by the Bonferroni method.

### All patients except EMS witnessed cardiac arrests

The incidence of patients receiving bystander CPR, having a public defibrillator connected, and receiving a shock before EMS arrival was higher in NorCAR than in GRR, giving a higher number of patients successfully resuscitated before EMS arrival (Table 2).



Table 2: Patients resuscitated by bystander or EMS, except EMS and first responder witnessed cardiac arrests.

|                                                                                 | GRR        | NorCAR     | P-value |
|---------------------------------------------------------------------------------|------------|------------|---------|
| All patients except EMS and first responder witnessed                           | N=25135    | N=14545    |         |
| Incidence per 100,000 inhabitants                                               | 58.7       | 55.2       | p<0.001 |
| Median response interval in minutes (IQR)                                       | 8 (6-10)   | 9 (6-14)   | p<0.001 |
| Response interval - missing (%)                                                 | 608 (2)    | 252 (2)    |         |
| Bystander CPR (%)                                                               | 11056 (44) | 11803 (82) | p<0.001 |
| Public defibrillator connected (%)                                              | 482 (2)    | 853 (6)    | p<0.001 |
| Shock by public defibrillator if connected (%) *                                | 126 (26)   | 260 (30)   | p<0.001 |
| Shocked by public defibrillator before EMS arrival, and ROSC on EMS arrival (%) | 107 (0.4)  | 116 (0.8)  | p<0.001 |

GRR – German Resuscitation Registry – areas with good quality data, NorCAR – Norwegian Cardiac Arrest Registry, EMS – emergency medical service, CPR – cardiopulmonary resuscitation. \* Percentage calculated based on the number of connected public defibrillators

The median response interval was 8 minutes in GRR (IQR 6-10) and 9 minutes in NorCAR (IQR 6-14). In NorCAR, the EMS personnel chooses not to start resuscitation, despite bystanders having started CPR, in 16% of the patients, most of whom had a pulse on EMS arrival. The proportion of patients not treated by EMS in GRR was 1%.

### CPR by EMS

The reported incidence of patients resuscitated by EMS per 100,000 inhabitants was 67 in GRR and 53 in NorCAR. More patients were declared dead on scene in NorCAR, while the

incidence of patients “Transported to hospital” and “Arrival to hospital with ROSC” was higher in GRR. (Table 3) The incidence of 24-hour survival was higher in GRR, but there was no statistical difference in overall survival. (Figure 3)

Table 3: Outcome for all EMS-treated patients per 100,000 inhabitants

| CPR by EMS                                | GRR<br>N=28786 | NorCAR<br>N=13704 | P-value |
|-------------------------------------------|----------------|-------------------|---------|
| Incidence of EMS treated patients         | 67.2           | 52.8              | p<0.001 |
| Incidence of transport to hospital (%)*   | 31.7 (47)      | 19.5 (37)         | p<0.001 |
| Status on arrival to hospital             |                |                   |         |
| Incidence of arrival with ROSC (%)        | 24.3 (36)      | 15.1 (29)         | p<0.001 |
| Incidence of arrival with ongoing CPR (%) | 7.4 (11)       | 4.1 (8)           | p<0.001 |
| Incidence of 24-hour survival (%) **      | 15.5 (23)      | 13.7 (24)         | p<0.001 |
| Incidence of survival (%) ***             | 8.0 (12)       | 7.8 (15)          | p=0.42  |

GRR – German Resuscitation Registry – areas with good quality data, NorCAR – Norwegian Cardiac Arrest Registry, ROSC – return of spontaneous circulation, CPR - cardiopulmonary resuscitation, EMS – emergency medical service, PCI - Percutaneous Coronary Intervention.

\* Declared dead/transport to hospital – missing 265 (1%) in GRR and 104 (1%) in NorCAR,

\*\* 24-hour survival – missing 2273 (8%) in GRR and 195 (1%) in NorCAR

\*\*\* Survival – missing 1931 (7%) in GRR and 165 (1%) in NorCAR

The use of a mechanical chest compressions device was higher in NorCAR than in GRR (4020 of 13704 (29%) vs 3223 of 28786 (11%) respectively, p<0.001). For patients transported to hospital and arriving with ROSC or ongoing CPR, 1987 of 13571 (15%) of the

patients in GRR and 1079 of 4962 (22%) of the patients in NorCAR were transported directly to the PCI lab on arrival.

### Utstein comparator group

The incidence of patients in the Utstein group was higher in GRR, but they constituted a smaller proportion of the EMS-treated population (14 vs 17 %). Bystander CPR was higher in NorCAR (1961 of 2274 (86%)) than in GRR (2726 of 4155 (66%)). For patients transported to hospital and arriving with ROSC or ongoing CPR, 879 of 3362 (26%) of the patients in GRR and 548 of 1502 (37%) of the patients in NorCAR were transported directly to the PCI lab on arrival. The incidence of prehospital ROSC and survival to 24-hours was higher in GRR (Table 4 and Figure 4), but the incidence of overall survival was higher in NorCAR.

Table 4: Outcome for the Utstein comparator group per 100,000 inhabitants

| Utstein comparator group                              | GRR<br>N=4155 | NorCAR<br>N= 2274 | P-value |
|-------------------------------------------------------|---------------|-------------------|---------|
| Incidence in the Utstein comparator group             | 9.7           | 8.8               | p<0.001 |
| Incidence of transport to hospital (%) *              | 7.8 (81)      | 6.2 (71)          | p<0.001 |
| Status on arrival to hospital                         |               |                   |         |
| Incidence of arrival to hospital with ROSC (%)        | 6.4 (66)      | 5.0 (57)          | p<0.001 |
| Incidence of arrival to hospital with ongoing CPR (%) | 1.4 (15)      | 0.8 (9)           | p<0.001 |
| Incidence of 24-hour survival (%) **                  | 5.0 (13)      | 5.2 (54)          | p=0.21  |
| Incidence of survival (%) ***                         | 3.5 (36)      | 3.8 (43)          | p=0.04  |

GRR – German Resuscitation Registry – areas with good quality data, NorCAR – Norwegian Cardiac Arrest Registry, Utstein comparator group - out-of-hospital cardiac arrest (OHCA)

1  
2  
3 *witnessed by a bystander and shockable first rhythm. CPR - cardiopulmonary resuscitation,*  
4  
5 *ROSC – return of spontaneous circulation, EMS – emergency medical service.*  
6

7 \* *Declared dead/transport to hospital – missing, 16 (<1%) in GRR and 1 (<1%) in NorCAR.*

9  
10 \*\* *24-hour survival – missing, 541 (13%) in GRR and 28 (1%) in NorCAR.*

11  
12 \*\*\* *Survival – missing, 455 (11%) in GRR and 24(1%) in NorCAR.*  
13  
14  
15  
16  
17

## 18 DISCUSSION

19  
20  
21 The incidence of cardiac arrest per 100,000 inhabitants is higher in GRR compared to  
22  
23 NorCAR. GRR reports a higher incidence of EMS treated patients, a higher incidence of  
24  
25 patients transported to the hospital and a higher incidence of patients arriving in the hospital  
26  
27 with ROSC. The overall incidence of survival is similar in both countries. For the Utstein  
28  
29 comparator group, the incidence of survival is marginally higher in NorCAR. Patient  
30  
31 characteristics in both countries, such as age and gender, confirms previous reports<sup>6</sup>.  
32  
33  
34  
35  
36

37  
38 Using registry data from two different countries, we encountered some challenges. A certain  
39  
40 amount of recoding of variables had to be done, notably using survival to hospital discharge  
41  
42 in GRR and 30-day survival in NorCAR. Both survival to discharge, and 30-day survival,  
43  
44 have been used interchangeably in other international studies, including the latest  
45  
46 recommendations for reporting<sup>9</sup>. Also, in a registry, it is not easy to verify the completeness  
47  
48 of cases<sup>21</sup>. Most EMS services in Europe have a paper-based reporting system, and there are  
49  
50 no electronically available patient charts to use as controls. Both GRR and NorCAR are  
51  
52 dependent on the attending EMS personnel remembering to submit a form after the event.  
53  
54 This form is then manually entered into the registry database by data managers.  
55  
56  
57

1  
2  
3  
4  
5 Comparing a voluntary registry with a mandatory registry, we were worried about missing  
6 information. In the latest published update on uniform reporting of cardiac arrest, the Utstein  
7 reporting format, the authors stress the importance of reducing missing information<sup>9</sup>. We  
8 found that the rate of missing information is overall higher in GRR, and the variable with the  
9 highest missing rate is survival (7 %). Survival information is mostly missing from entire  
10 hospitals, indicating that missing cases include both survivors and non-survivors. Due to GRR  
11 being a voluntary registry, information on cardiac arrest cases is not available from the entire  
12 country. Results are, however, comparable to overall results in yearly reports from GRR and  
13 the data in this study are considered to be representable for all regions reporting to the  
14 registry<sup>17</sup>.  
15  
16  
17  
18  
19  
20  
21  
22  
23  
24  
25  
26  
27  
28  
29  
30

31 Reporting the incidence of cardiac arrest is primarily done using the number of patients per  
32 100,000 inhabitants in the population served by the EMS<sup>6-8</sup>. Survival, however, is often  
33 presented as a proportion of the EMS treated patients. Percentages are presumed to be easier  
34 to understand and make comparability with already published data more straightforward.  
35 During the Covid-19 pandemic, healthcare professionals and the general public have become  
36 more used to population incidence as a measurement, and we believe it is time for survival  
37 after cardiac arrest to be published in this way. In 1993, Becker et al.<sup>22</sup> published an analysis  
38 on the relationship between reported incidence and survival rates and advised incidence and  
39 not percentages. When there is more than a 3-fold difference in the incidence of EMS treated  
40 patients, as reported in the latest EuReCa study,<sup>6</sup> higher survival rates do not necessarily  
41 represent better quality of care. The difference could be that a registry with a low survival  
42 percentage is better at identifying all patients resuscitated by the EMS. Our study shows that  
43 the incidence of survival is similar in GRR and NorCAR, but the incidence of included  
44  
45  
46  
47  
48  
49  
50  
51  
52  
53  
54  
55  
56  
57  
58  
59  
60

1  
2  
3 patients is not. If we calculate the survival rate based on the number of patients resuscitated  
4  
5 by the EMS, Norway seems to have better survival (15%) than Germany (12%).  
6  
7

8  
9  
10 Differences in the incidence of cardiac arrest overall, and the EMS treated patients in  
11  
12 particular, could be due to differences in public health in general and cardiovascular health in  
13  
14 particular. According to the European Unions' statistics, cardiovascular disease deaths account  
15  
16 for 37% of deaths in Germany, but only 26% in Norway<sup>23</sup>. Population density, geography and  
17  
18 placement of ambulances might also have an impact. Both countries adhere to European  
19  
20 guidelines for resuscitation,<sup>24</sup> but in Norway, withholding care in the prehospital setting is  
21  
22 more common.  
23  
24  
25

26  
27  
28 Response interval is the time interval from a call is received at an EMCC to the first  
29  
30 ambulance arrives at the defined address. Response interval should ideally include the delay  
31  
32 until EMS personnel are at the patient side, but the latter time point remains elusive due to  
33  
34 manual registration. The extended response interval in Norway provides dispatchers more  
35  
36 time to help bystanders start CPR, connect and use a defibrillator, and is associated with a  
37  
38 significantly higher number of patients having been successfully resuscitated before EMS  
39  
40 arrival. On the downside, it probably also has a negative effect on survival<sup>25 26</sup>. The narrow  
41  
42 distribution of response intervals in GRR (25- and 75-percentiles of 6 and 10 minutes)  
43  
44 compared with the broader distribution found in NorCAR (25- and 75-percentiles of 6 and 14  
45  
46 minutes) indicates differences caused by geography and population density. Extended  
47  
48 response intervals might also explain the lower incidence of EMS treated patients in Norway  
49  
50 as bystanders or EMS personnel perceive resuscitation as futile when the response interval is  
51  
52 prolonged.  
53  
54  
55  
56  
57  
58  
59  
60

1  
2  
3 The Utstein comparator group is a sub-group that enables comparison between countries<sup>9</sup>.  
4  
5 This sub-group has a more uniform treatment recommendation than the total population of  
6  
7 patients with OHCA and does not include cases with unknown delay from collapse. Our  
8  
9 results confirm that the differences between our countries also extends to this specific group.  
10  
11 Differences between countries in the Utstein comparator group have been shown in several  
12  
13 studies previously<sup>6 10 27</sup>.  
14  
15  
16  
17  
18

19 In Norway, all hospitals are state-owned, and the Norwegian Directory of Health issues  
20  
21 guidelines for treatment. Results from quality registries are published yearly, naming and  
22  
23 shaming hospitals and their adherence to guidelines<sup>28</sup>. There is a bypass protocol for the  
24  
25 nearest University Hospital capable of performing PCI for cardiac arrest patients. If transport  
26  
27 duration is prolonged, there are guidelines for prehospital treatment, including thrombolysis.  
28  
29 In Norway, the in-hospital treatment after OHCA is standardised, but this is not the case in  
30  
31 most German hospitals. In 2019, the German Resuscitation Council started an initiative to  
32  
33 certify cardiac arrest centres, and GRR extended the benchmarking facilities for cardiac arrest  
34  
35 centres<sup>29</sup>.  
36  
37  
38  
39  
40  
41

42 Several factors are associated with increased survival after OHCA; younger age, presumed  
43  
44 cardiac cause, shockable first rhythm, witnessed collapse, location of arrest in a public place,  
45  
46 bystander CPR, early shock by a defibrillator, a short time from collapse to arrival of EMS  
47  
48 and good post-resuscitation care including temperature control and PCI<sup>15 30</sup>. Compared to  
49  
50 GRR, the patients in NorCAR are younger, witnessed collapse is more common and more  
51  
52 than four out of five receive bystander CPR. Compared to NorCAR, the patients in GRR more  
53  
54 often have presumed cardiac cause, initial rhythm is shockable, and the EMS's response  
55  
56 interval is shorter. There is a mix of factors associated with survival in both countries.  
57  
58  
59  
60

1  
2  
3  
4  
5 This study has helped us identify differences and similarities in the cardiac arrest registries in  
6 Germany and Norway and identify potential confounders for future studies. In this  
7  
8 comparison, we cannot tease out the relative importance of factors associated with increased  
9  
10 survival, and in future studies, we should analyse individual cases using more sophisticated  
11  
12 statistical methods.  
13  
14  
15  
16  
17  
18

### 19 **Implication for the future**

20  
21  
22 Based on our findings, we recommend all nations make cardiac arrest a reportable condition.  
23  
24 Making reporting mandatory provides an opportunity to follow a patient through the  
25  
26 healthcare system and to evaluate how an intervention affects care, health, and cost.<sup>31</sup> When  
27  
28 participation in a registry is voluntary, it is difficult to conclude that results are representative  
29  
30 for a larger population. If cardiac arrest is not a reportable condition, there is a greater risk  
31  
32 that EMS systems and hospitals deliberately do not participate because of fear that their level  
33  
34 of care is sub-optimal.  
35  
36  
37  
38  
39  
40  
41

42 Treating and reporting many patients that do not survive will give a low survival rate, while  
43  
44 treating and reporting a low number of non-survivors will give a high survival rate. Reporting  
45  
46 inclusion and results as incidence per 100,000 inhabitants is essential if we wish to know the  
47  
48 burden of disease in a population, and it is a way of making results more comparable as  
49  
50 variation in how prehospital providers perceive futility and variable reporting practices will  
51  
52 have less impact on the overall reported survival.<sup>6-8 12</sup>  
53  
54  
55  
56  
57  
58  
59  
60



## CONCLUSION

This cross-sectional study shows the importance of comparing the incidence of survival based on the population served and not on the percentage of EMS treated patients. When comparing data from OHCA registries, especially when comparing survival, we recommend using incidence per 100,000 inhabitants, and we believe it is time to stop reporting survival as percentages.

We found that the EMS in Germany started CPR on a higher number of cardiac arrest patients, and the incidence of patients transported to the hospital and arriving with ROSC is higher than in NorCAR. We speculate that the difference in overall incidence and incidence of EMS treated patients is due to an interaction between response intervals, bystander CPR, age and EMS organisation. A multivariate analysis should be performed to better understand our findings.

## DECLARATION

### Competing interests

JTG reports grants from the German Anaesthesiology Association during the conduct of the study; personal Speaker fee and travel cost outside the submitted work. All authors report receiving a grant from the German-Norwegian student centre at Christian-Albrechts-University in Kiel.

1  
2  
3 Non-financial associations: JW and SS are members of the steering committee of the German  
4 Resuscitation Registry. JKJ is a member of the Steering Committee of the Norwegian Cardiac  
5 Arrest Registry. IT is the leader of the Norwegian Cardiac Arrest Registry.  
6  
7  
8  
9

### 10 11 12 **Funding statement**

13  
14 This work was supported by the German-Norwegian student centre at Christian-Albrechts-  
15 University in Kiel; the funds facilitate meetings in Kiel and Oslo. Award/grant number: not  
16 applicable.  
17  
18  
19  
20

21  
22  
23  
24 No other funding was received.  
25  
26  
27

### 28 29 **Ethical approval and consent to participate**

30 The scientific advisory board of the German Resuscitation Registry (Ref. no.: 20190128\_BJ)  
31 and the steering committee of the Norwegian Cardiac Arrest Registry has approved the study  
32 (reference: 23092019\_Article).  
33  
34  
35

36  
37 The study is approved by the ethics committee of the University of Kiel (Ref. no.: D435/21).  
38

39 Informed consent from patients is not needed.  
40  
41  
42  
43

### 44 45 **Data sharing statement**

46 The data that support the findings of this study are available from the German Resuscitation  
47 Registry and the Norwegian Cardiac Arrest Registry through an application to the registry  
48 based on the regulation of each registry. Restrictions apply.  
49  
50  
51  
52  
53  
54

### 55 56 **Author Contributions**

57  
58  
59  
60 22

1  
2  
3 **IT:** contributed to the conception, planning, design, acquisition of data, analysis and  
4 interpretation of data, the first draft of the article, revision of draft and approval of the final  
5 manuscript.  
6  
7

8  
9  
10 **KAK:** contributed to the conception, planning, design, interpretation of data, the first draft of  
11 the article, revision of draft and approval of the final manuscript.  
12  
13

14 **JTG:** contributed to the conception, planning, design, acquisition of data, analysis and  
15 interpretation of data, the first draft of the article, revision of draft and approval of the final  
16 manuscript.  
17  
18

19 **CBI:** contributed to the conception, planning, design, revision of draft and approval of the  
20 final manuscript.  
21  
22

23 **BJ:** contributed to the conception, planning, design, acquisition of data, analysis and  
24 interpretation of data, revision of draft and approval of the final manuscript.  
25  
26

27 **JKJ:** contributed to the conception, planning, design, analysis and interpretation of data, the  
28 first draft of the article, revision of draft and approval of the final manuscript.  
29  
30

31 **NR:** contributed to the conception, planning, design, revision of draft and approval of the  
32 final manuscript.  
33  
34

35 **JW:** contributed to the conception, planning, design, acquisition of data, analysis and  
36 interpretation of data, the first draft of the article, revision of draft and approval of the final  
37 manuscript.  
38  
39

40 **SS:** contributed to the conception, planning, design, acquisition of data, analysis and  
41 interpretation of data, the first draft of the article, revision of draft and approval of the final  
42 manuscript.  
43  
44  
45  
46  
47  
48  
49  
50  
51

## REFERENCES

1. Resuscitation Academy. 10 STEPS for Improving Survival from Cardiac Arrest. In: Resuscitation Academy, ed. [https://globalresuscitationalliance.org/downloads/ebook/10\\_steps\\_2019.pdf](https://globalresuscitationalliance.org/downloads/ebook/10_steps_2019.pdf), 2019.
2. Chamberlain D. A prize worth the effort: a common European registry of out-of-hospital cardiac arrest. *Resuscitation* 2011;82(8):965-6. doi: 10.1016/j.resuscitation.2011.05.014 [published Online First: 2011/06/21]
3. Cummins RO, Ornato JP, Thies WH, et al. Improving survival from sudden cardiac arrest: the "chain of survival" concept. A statement for health professionals from the Advanced Cardiac Life Support Subcommittee and the Emergency Cardiac Care Committee, American Heart Association. *Circulation* 1991;83(5):1832-47. doi: 10.1161/01.cir.83.5.1832 [published Online First: 1991/05/01]
4. Nichol G, Thomas E, Callaway CW, et al. Regional variation in out-of-hospital cardiac arrest incidence and outcome. *JAMA* 2008;300(12):1423-31. doi: 10.1001/jama.300.12.1423 [published Online First: 2008/09/25]
5. Berdowski J, Berg RA, Tijssen JG, et al. Global incidences of out-of-hospital cardiac arrest and survival rates: Systematic review of 67 prospective studies. *Resuscitation* 2010;81(11):1479-87. doi: 10.1016/j.resuscitation.2010.08.006
6. Grasner JT, Wnent J, Herlitz J, et al. Survival after out-of-hospital cardiac arrest in Europe - Results of the EuReCa TWO study. *Resuscitation* 2020;148:218-26. doi: 10.1016/j.resuscitation.2019.12.042 [published Online First: 2020/02/07]
7. Kiguchi T, Okubo M, Nishiyama C, et al. Out-of-hospital cardiac arrest across the World: First report from the International Liaison Committee on Resuscitation (ILCOR). *Resuscitation* 2020;152:39-49. doi: 10.1016/j.resuscitation.2020.02.044 [published Online First: 2020/04/10]
8. Gräsner JT, Lefering R, Koster RW, et al. EuReCa ONE-27 Nations, ONE Europe, ONE Registry: A prospective one month analysis of out-of-hospital cardiac arrest outcomes in 27 countries in Europe. *Resuscitation* 2016;105:188-95. doi: 10.1016/j.resuscitation.2016.06.004 [published Online First: 2016/06/21]
9. Perkins GD, Jacobs IG, Nadkarni VM, et al. Cardiac Arrest and Cardiopulmonary Resuscitation Outcome Reports: Update of the Utstein Resuscitation Registry Templates for Out-of-Hospital Cardiac Arrest: A Statement for Healthcare

- 1  
2  
3  
4 Professionals From a Task Force of the International Liaison Committee on  
5 Resuscitation (American Heart Association, European Resuscitation Council,  
6 Australian and New Zealand Council on Resuscitation, Heart and Stroke Foundation  
7 of Canada, InterAmerican Heart Foundation, Resuscitation Council of Southern  
8 Africa, Resuscitation Council of Asia); and the American Heart Association  
9 Emergency Cardiovascular Care Committee and the Council on Cardiopulmonary,  
10 Critical Care, Perioperative and Resuscitation. *Resuscitation* 2015;96:328-40. doi:  
11 10.1016/j.resuscitation.2014.11.002 [published Online First: 2014/12/02]  
12  
13  
14  
15  
16  
17 10. Masterson S, Stromsoe A, Cullinan J, et al. Apples to apples: can differences in out-of-  
18 hospital cardiac arrest incidence and outcomes between Sweden and Ireland be  
19 explained by core Utstein variables? *Scand J Trauma Resusc Emerg Med*  
20 2018;26(1):37. doi: 10.1186/s13049-018-0505-2 [published Online First: 2018/05/05]  
21  
22  
23  
24 11. Maurer H, Masterson S, Tjelmeland IB, et al. When is a bystander not a bystander any  
25 more? A European survey. *Resuscitation* 2019;136:78-84. doi:  
26 10.1016/j.resuscitation.2018.12.009 [published Online First: 2018/12/21]  
27  
28  
29 12. McNally B. 2019 Annual report CARES Cardiac Arrest Registry to Enhance Survival. In:  
30 CARES, ed.  
31 [https://mycares.net/sitepages/uploads/2020/2019\\_flipbook/index.html?page=20](https://mycares.net/sitepages/uploads/2020/2019_flipbook/index.html?page=20),  
32 2020:48.  
33  
34  
35 13. Tjelmeland IBM, Masterson S, Herlitz J, et al. Description of Emergency Medical  
36 Services, treatment of cardiac arrest patients and cardiac arrest registries in Europe.  
37 *Scand J Trauma Resusc Emerg Med* 2020;28(1):103. doi: 10.1186/s13049-020-00798-  
38 7 [published Online First: 2020/10/21]  
39  
40  
41  
42 14. Roessler M, Zuzan O. EMS systems in Germany. *Resuscitation* 2006;68(1):45-9. doi:  
43 10.1016/j.resuscitation.2005.08.004 [published Online First: 2006/01/13]  
44  
45  
46 15. Grasner JT, Meybohm P, Lefering R, et al. ROSC after cardiac arrest--the RACA score to  
47 predict outcome after out-of-hospital cardiac arrest. *European heart journal*  
48 2011;32(13):1649-56. doi: 10.1093/eurheartj/ehr107 [published Online First:  
49 2011/04/26]  
50  
51  
52 16. Seewald S, Wnent J, Lefering R, et al. CaRdiac Arrest Survival Score (CRASS) - A tool  
53 to predict good neurological outcome after out-of-hospital cardiac arrest. *Resuscitation*  
54 2020;146:66-73. doi: 10.1016/j.resuscitation.2019.10.036 [published Online First:  
55 2019/11/16]  
56  
57  
58  
59  
60

- 1  
2  
3  
4 17. Fischer M, Wnent J, Gräsner JT, et al. Jahresbericht des Deutschen Reanimationsregisters  
5 – Außerklinische Reanimation 2019. *Anästh Intensivmed* 2020(61):89-93.  
6  
7 18. Tjelmeland IBM, Alm-Kruse K, Andersson LJ, et al. Cardiac arrest as a reportable  
8 condition: a cohort study of the first 6 years of the Norwegian out-of-hospital cardiac  
9 arrest registry. *BMJ Open* 2020;10(7):e038133. doi: 10.1136/bmjopen-2020-038133  
10 [published Online First: 2020/07/10]  
11  
12  
13 19. von Elm E, Altman DG, Egger M, et al. Strengthening the Reporting of Observational  
14 Studies in Epidemiology (STROBE) statement: guidelines for reporting observational  
15 studies. *BMJ* 2007;335(7624):806-8. doi: 10.1136/bmj.39335.541782.AD [published  
16 Online First: 2007/10/20]  
17  
18  
19  
20 20. Jacobs I, Nadkarni V, Bahr J, et al. Cardiac arrest and cardiopulmonary resuscitation  
21 outcome reports: update and simplification of the Utstein templates for resuscitation  
22 registries: a statement for healthcare professionals from a task force of the  
23 International Liaison Committee on Resuscitation (American Heart Association,  
24 European Resuscitation Council, Australian Resuscitation Council, New Zealand  
25 Resuscitation Council, Heart and Stroke Foundation of Canada, InterAmerican Heart  
26 Foundation, Resuscitation Councils of Southern Africa). *Circulation*  
27 2004;110(21):3385-97. doi: 10.1161/01.CIR.0000147236.85306.15 [published Online First: 2004/11/24]  
28  
29  
30  
31  
32  
33  
34 21. Stromsoe A, Svensson L, Axelsson AB, et al. Validity of reported data in the Swedish  
35 Cardiac Arrest Register in selected parts in Sweden. *Resuscitation* 2013;84(7):952-6.  
36 doi: 10.1016/j.resuscitation.2012.12.026 [published Online First: 2013/01/15]  
37  
38  
39  
40 22. Becker LB, Smith DW, Rhodes KV. Incidence of cardiac arrest: a neglected factor in  
41 evaluating survival rates. *Ann Emerg Med* 1993;22(1):86-91. doi: 10.1016/s0196-  
42 0644(05)80257-4 [published Online First: 1993/01/01]  
43  
44  
45 23. Statistical Office of the European Communities. Cardiovascular diseases statistics. Deaths  
46 from cardiovascular diseases. In: Eurostat, ed. European Commission's statistical  
47 office. [https://ec.europa.eu/eurostat/statistics-  
48 explained/index.php?title=Cardiovascular diseases statistics#Deaths from cardiovas-  
49 cular diseases](https://ec.europa.eu/eurostat/statistics-explained/index.php?title=Cardiovascular_diseases_statistics#Deaths_from_cardiovascular_diseases): Eurostat, 1990.  
50  
51  
52  
53 24. Nolan JP, Soar J, Cariou A, et al. European Resuscitation Council and European Society  
54 of Intensive Care Medicine Guidelines for Post-resuscitation Care 2015: Section 5 of  
55 the European Resuscitation Council Guidelines for Resuscitation 2015. *Resuscitation*  
56  
57  
58  
59  
60

- 1  
2  
3  
4 2015;95:202-22. doi: 10.1016/j.resuscitation.2015.07.018 [published Online First:  
5 2015/10/20]  
6  
7 25. Holmen J, Herlitz J, Ricksten SE, et al. Shortening Ambulance Response Time Increases  
8 Survival in Out-of-Hospital Cardiac Arrest. *J Am Heart Assoc* 2020;9(21):e017048.  
9 doi: 10.1161/JAHA.120.017048 [published Online First: 2020/10/28]  
10  
11 26. Burger A, Wnent J, Bohn A, et al. The Effect of Ambulance Response Time on Survival  
12 Following Out-of-Hospital Cardiac Arrest. *Dtsch Arztebl Int* 2018;115(33-34):541-48.  
13 doi: 10.3238/arztebl.2018.0541 [published Online First: 2018/09/08]  
14  
15 27. Lim SL, Smith K, Dyson K, et al. Incidence and Outcomes of Out-of-Hospital Cardiac  
16 Arrest in Singapore and Victoria: A Collaborative Study. *J Am Heart Assoc*  
17 2020;9(21):e015981. doi: 10.1161/JAHA.119.015981 [published Online First:  
18 2020/10/24]  
19  
20 28. Nasjonalt Servicemiljø for Medisinske Kvalitetsregistre. Resultat fra medisinske  
21 kvalitetsregistre (Results from medical quality registries) [Online]. SKDE; 2021 [cited  
22 2021 12.01.2021]. Webpage where results from all approved national medical quality  
23 registries are published]. Available from: <https://www.kvalitetsregistre.no> accessed  
24 12.01.2021 2021.  
25  
26 29. Rott N, Scholz KH, Busch HJ, et al. Cardiac Arrest Center Certification for out-of-  
27 hospital cardiac arrest patients successfully established in Germany. *Resuscitation*  
28 2020;156:1-3. doi: 10.1016/j.resuscitation.2020.08.007 [published Online First:  
29 2020/08/30]  
30  
31 30. Perkins GD, Graesner JT, Semeraro F, et al. European Resuscitation Council Guidelines  
32 2021: Executive summary. *Resuscitation* 2021;161:1-60. doi:  
33 10.1016/j.resuscitation.2021.02.003 [published Online First: 2021/03/29]  
34  
35 31. Berwick DM, Nolan TW, Whittington J. The triple aim: care, health, and cost. *Health Aff*  
36 (*Millwood*) 2008;27(3):759-69. doi: 10.1377/hlthaff.27.3.759 [published Online First:  
37 2008/05/14]  
38  
39  
40  
41  
42  
43  
44  
45  
46  
47  
48  
49  
50  
51  
52  
53  
54  
55  
56  
57  
58  
59  
60

## LEGEND TO FIGURES

*Figure 1: Flow of patients in the German Resuscitation Registry.*

*Figure 2: Flow of patients in the Norwegian Cardiac Arrest Registry.*

*Figure 3: All resuscitated patients included in the German and the Norwegian cardiac arrest registries per 100,000 inhabitants from 2015 and 2019. CPR - cardiopulmonary resuscitation, EMS – emergency medical personnel, ROSC – return of spontaneous circulation.*

*Figure 4: The Utstein comparator group. Incidence per 100,000. Utstein comparator group is cardiac arrest witnessed by a bystander and having a shockable rhythm. ROSC – return of spontaneous circulation.*



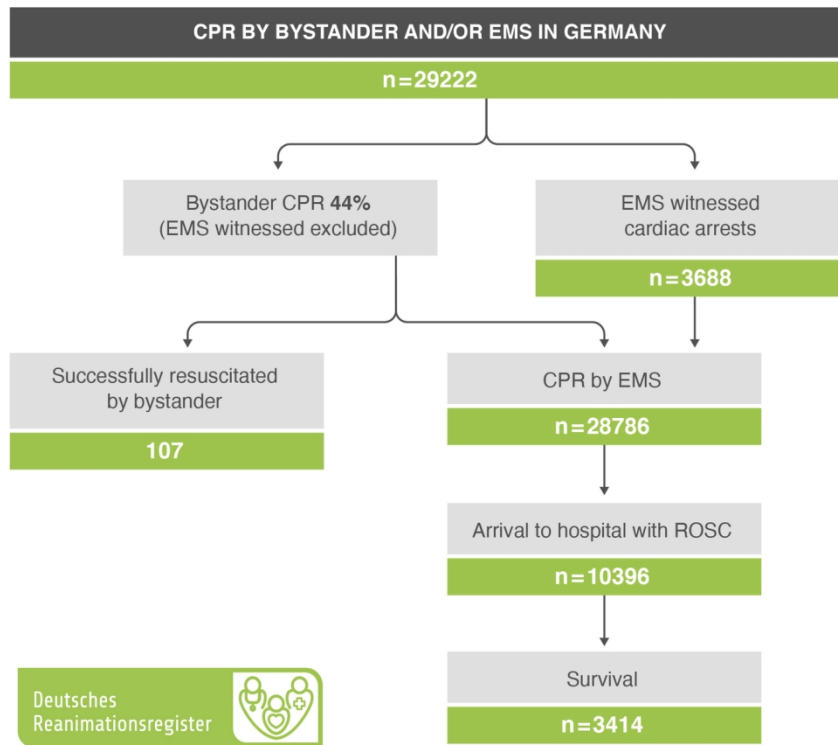

Figure 1: Flow of patients in the German Resuscitation Registry.

139x121mm (300 x 300 DPI)

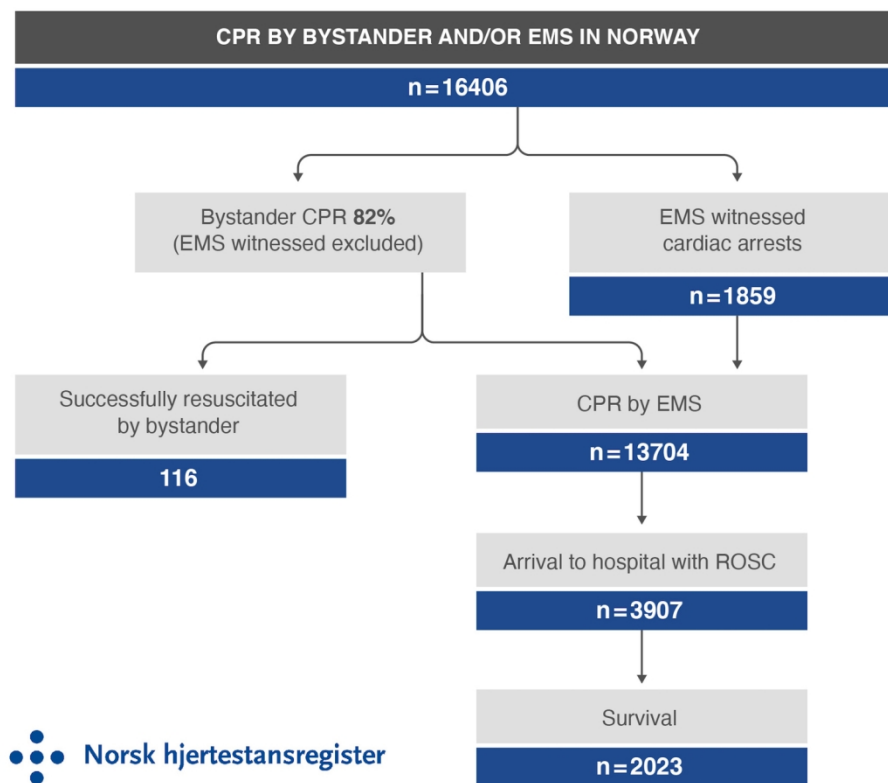

Figure 2: Flow of patients in the Norwegian Cardiac Arrest Registry.

139x127mm (300 x 300 DPI)

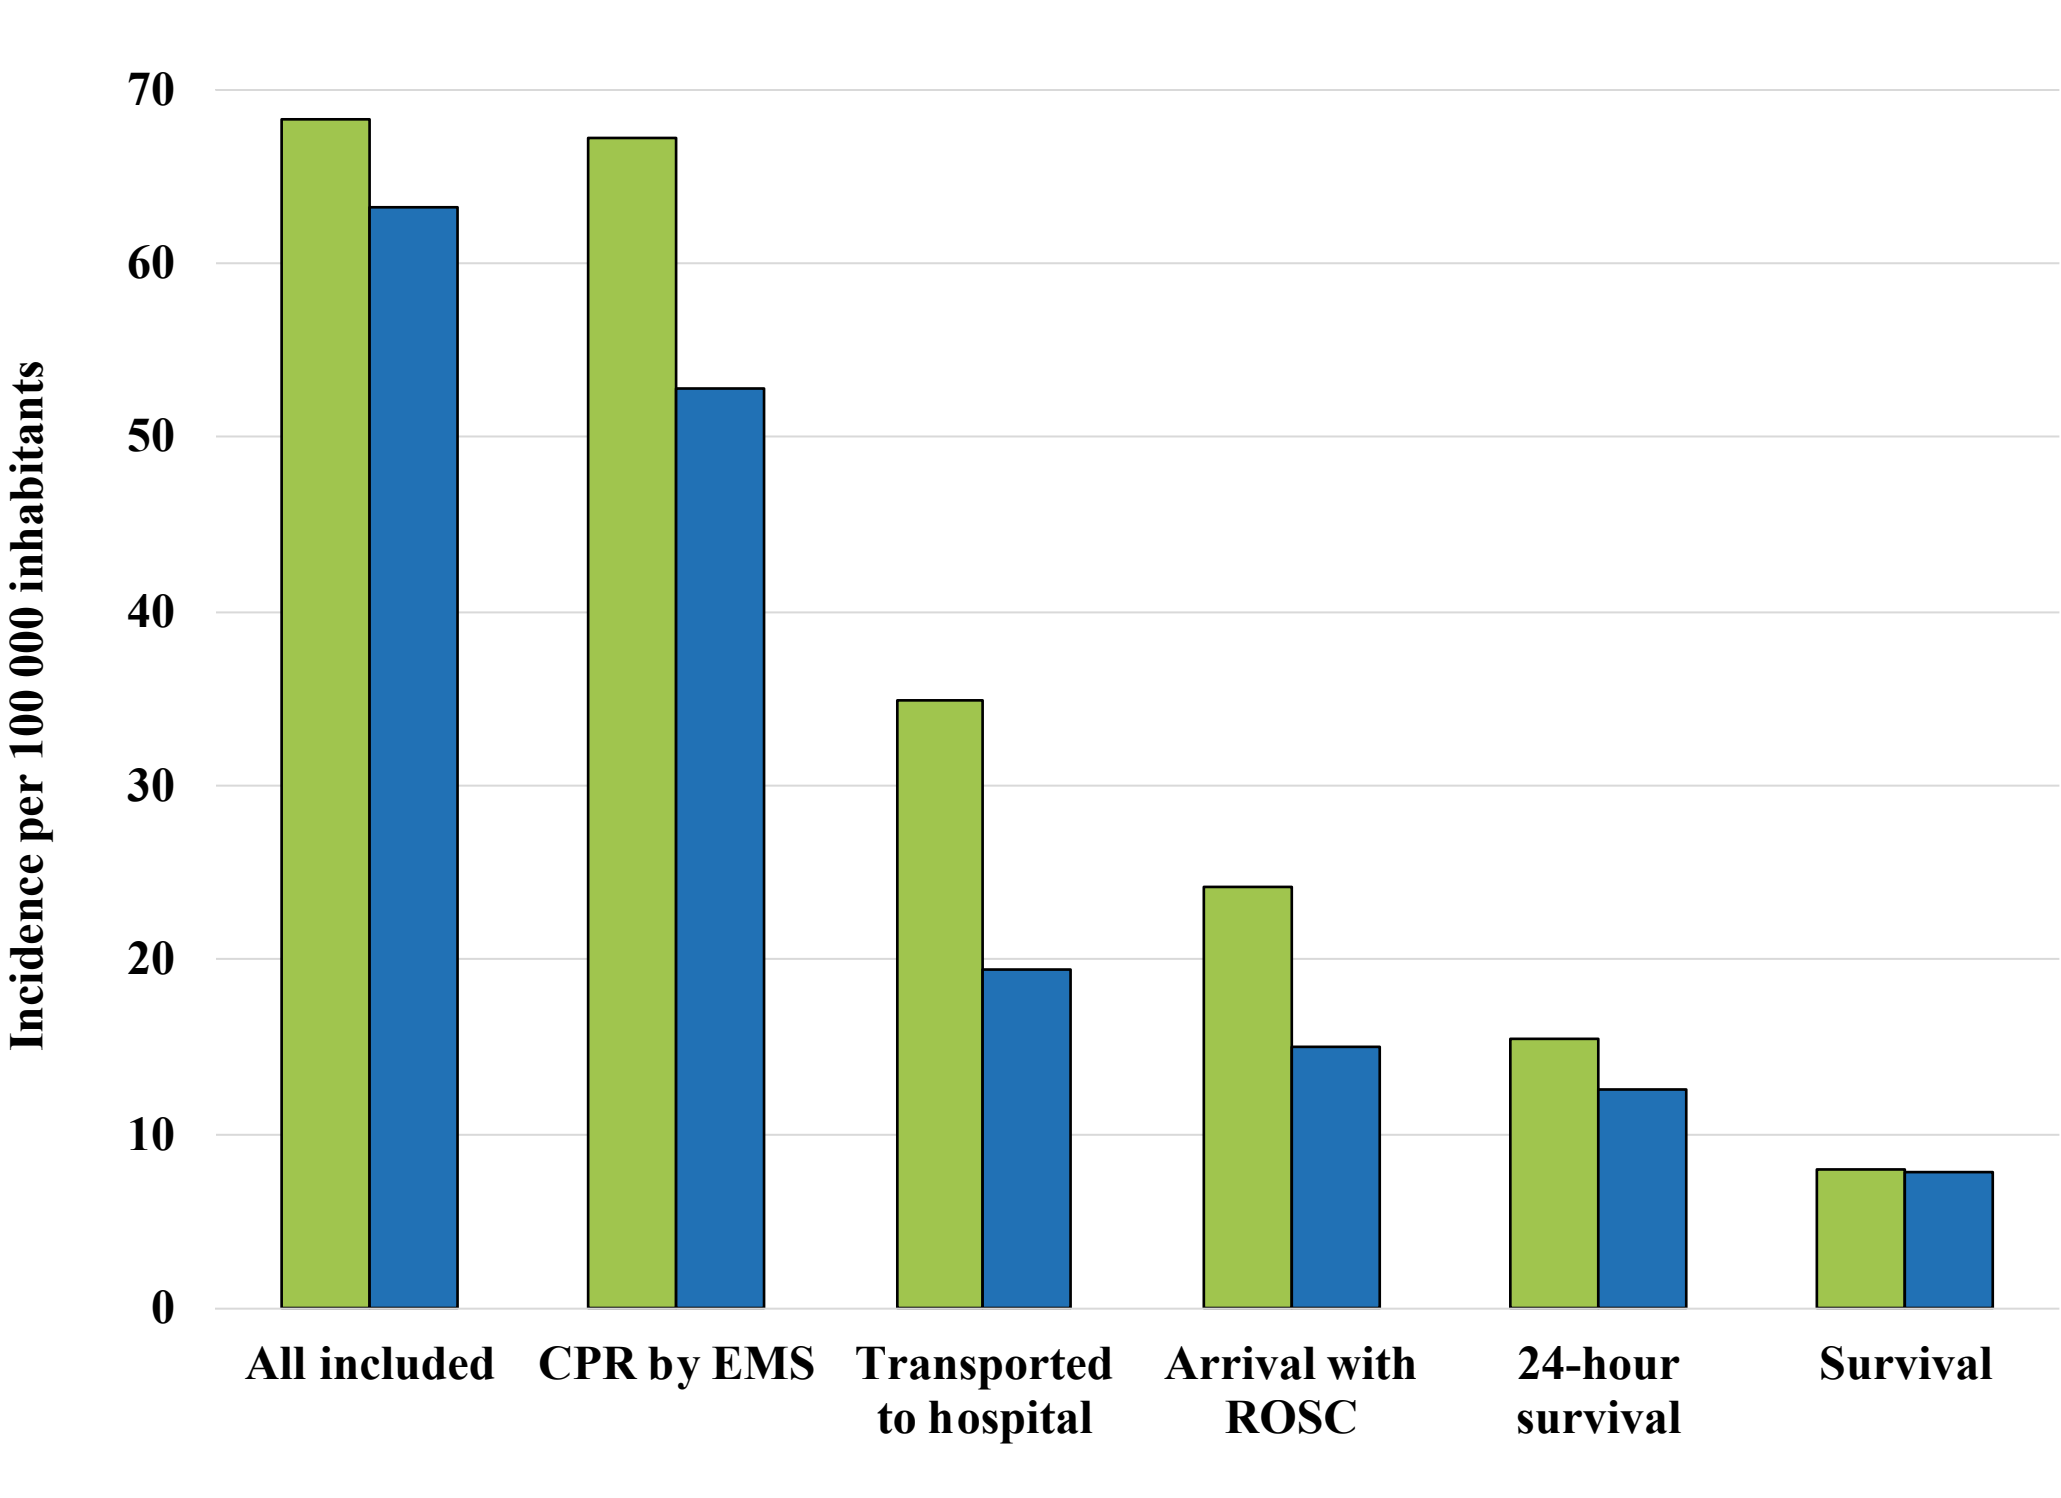

1  
2  
3  
4  
5  
6  
7  
8  
9  
10  
11  
12  
13  
14  
15  
16  
17  
18  
19  
20  
21  
22  
23  
24  
25  
26  
27  
28  
29  
30  
31  
32  
33  
34  
35  
36  
37  
38  
39  
40  
41  
42  
43  
44  
45  
46  
47  
48  
49  
50  
51

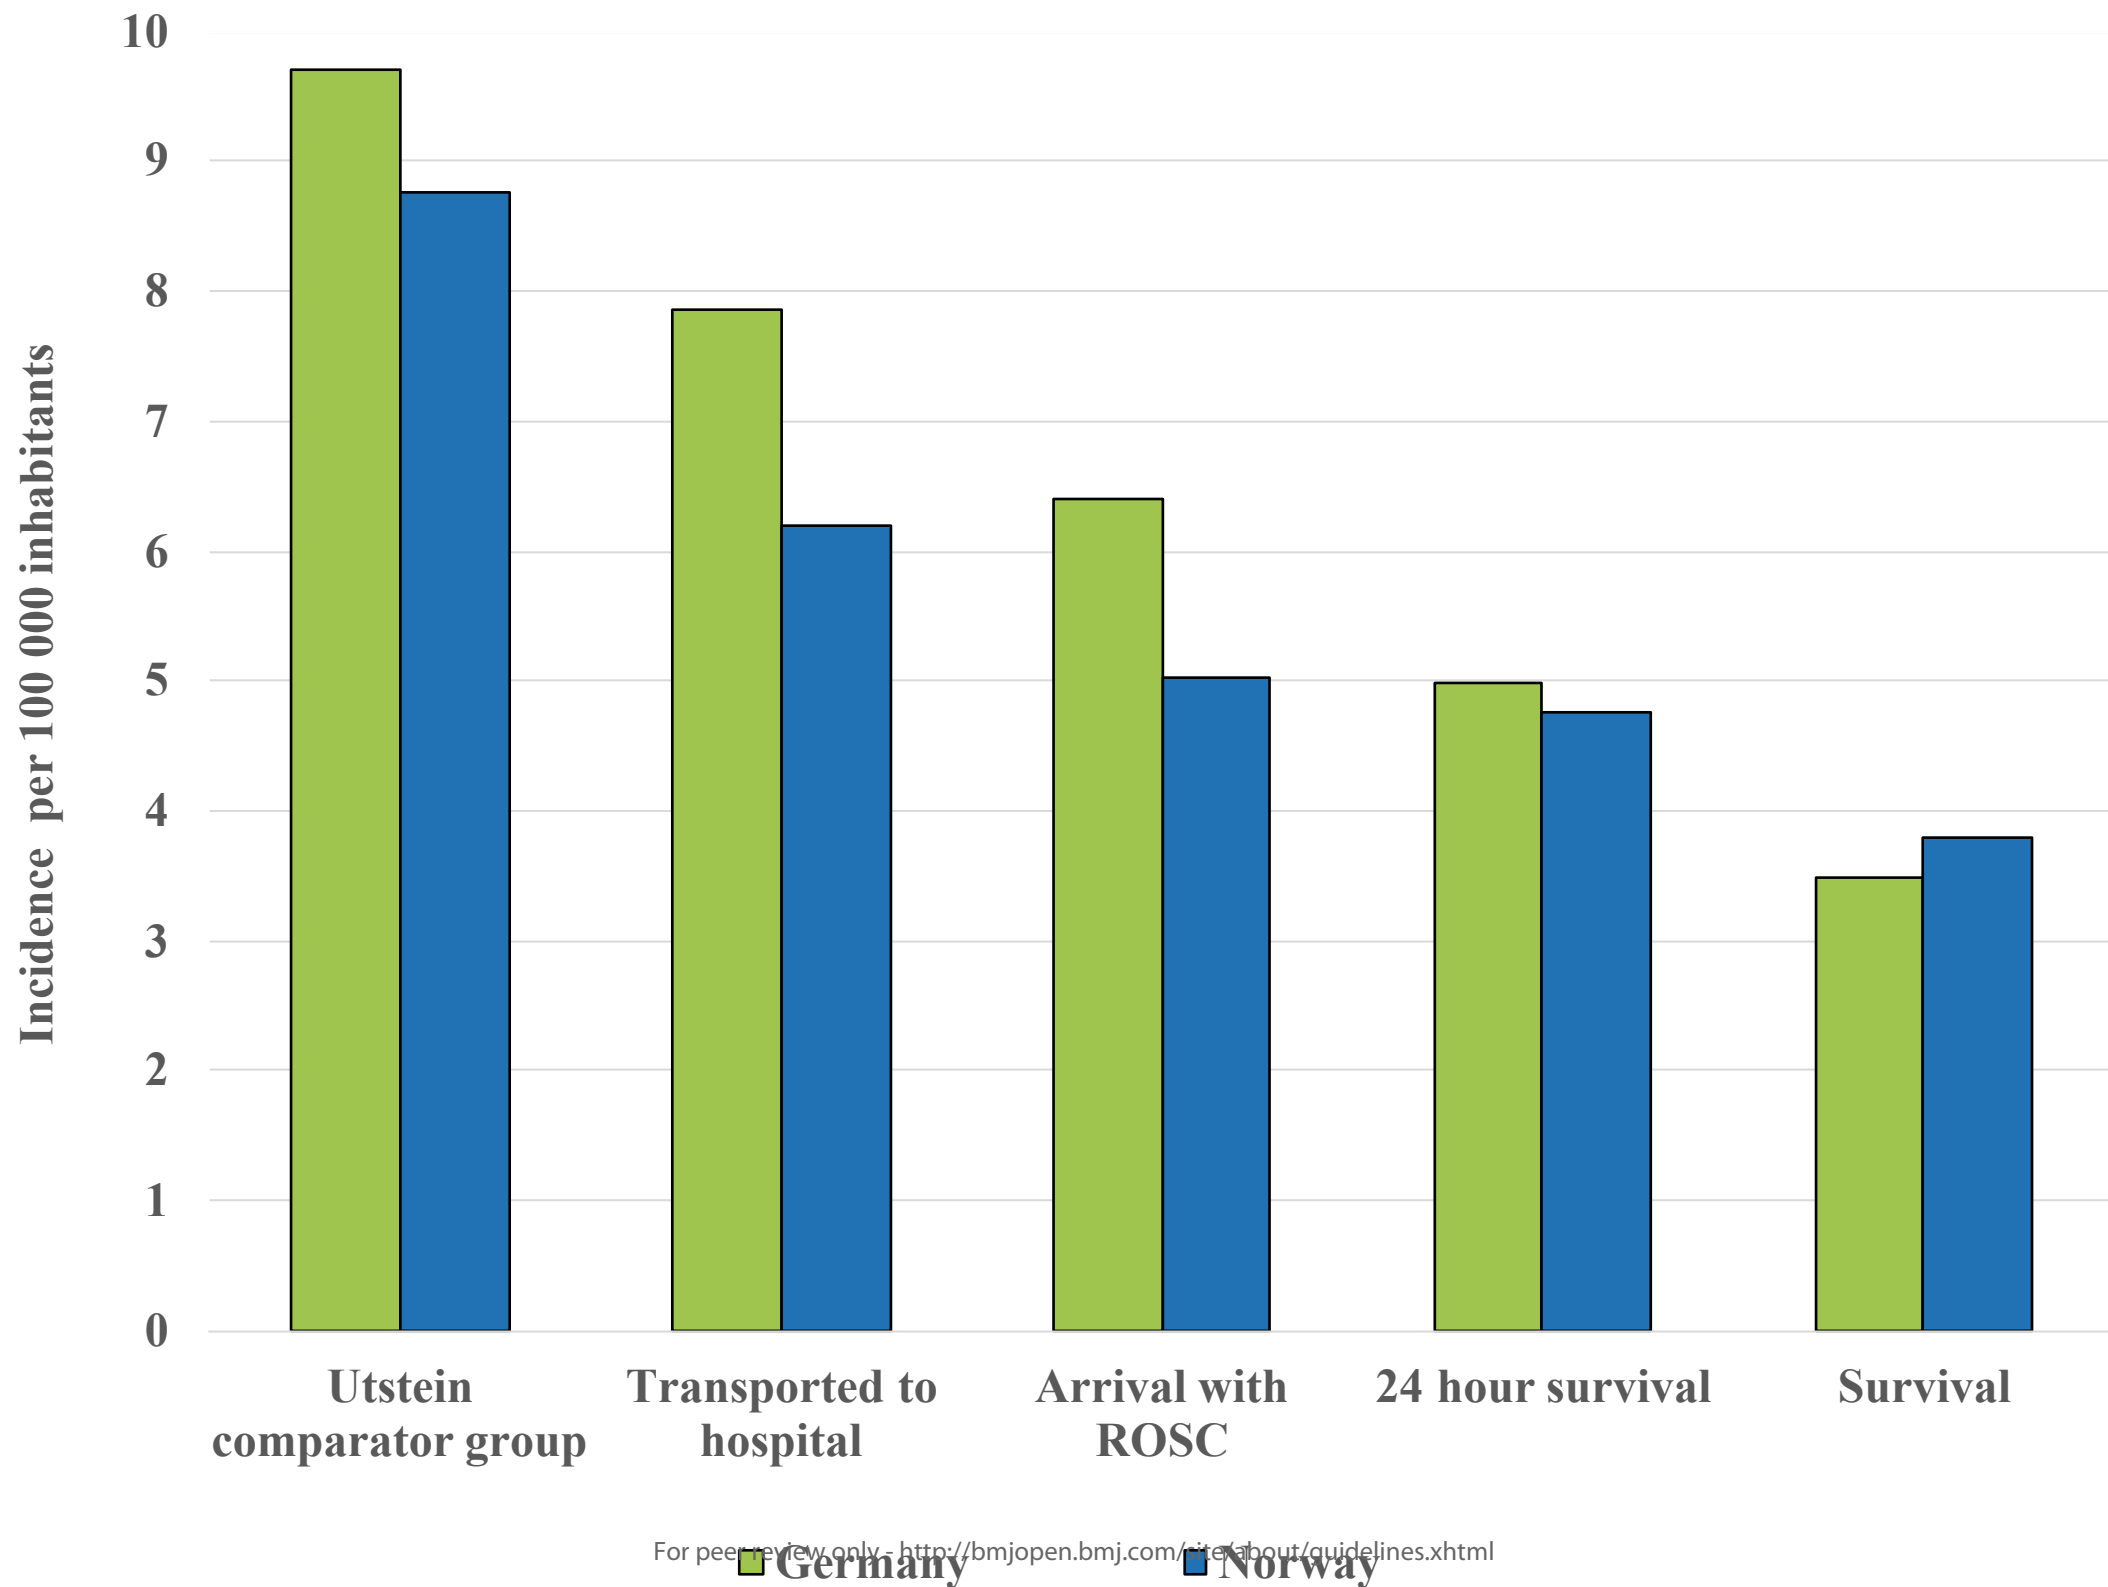

# Reporting checklist for cross sectional study.

|                            | Reporting Item                                                                                                                                                                                                                                                                          | Page Number                     |
|----------------------------|-----------------------------------------------------------------------------------------------------------------------------------------------------------------------------------------------------------------------------------------------------------------------------------------|---------------------------------|
| <b>Title and abstract</b>  |                                                                                                                                                                                                                                                                                         |                                 |
| Title                      | <a href="#">#1a</a> Indicate the study's design with a commonly used term in the title or the abstract                                                                                                                                                                                  | 1                               |
| Abstract                   | <a href="#">#1b</a> Provide in the abstract an informative and balanced summary of what was done and what was found                                                                                                                                                                     | 3                               |
| <b>Introduction</b>        |                                                                                                                                                                                                                                                                                         |                                 |
| Background / rationale     | <a href="#">#2</a> Explain the scientific background and rationale for the investigation being reported                                                                                                                                                                                 | 5                               |
| Objectives                 | <a href="#">#3</a> State specific objectives, including any prespecified hypotheses                                                                                                                                                                                                     | 5                               |
| <b>Methods</b>             |                                                                                                                                                                                                                                                                                         |                                 |
| Study design               | <a href="#">#4</a> Present key elements of study design early in the paper                                                                                                                                                                                                              | 5                               |
| Setting                    | <a href="#">#5</a> Describe the setting, locations, and relevant dates, including periods of recruitment, exposure, follow-up, and data collection                                                                                                                                      | 6-10                            |
| Eligibility criteria       | <a href="#">#6a</a> Give the eligibility criteria, and the sources and methods of selection of participants.                                                                                                                                                                            | 9                               |
|                            | <a href="#">#7</a> Clearly define all outcomes, exposures, predictors, potential confounders, and effect modifiers. Give diagnostic criteria, if applicable                                                                                                                             | 9                               |
| Data sources / measurement | <a href="#">#8</a> For each variable of interest give sources of data and details of methods of assessment (measurement). Describe comparability of assessment methods if there is more than one group. Give information separately for for exposed and unexposed groups if applicable. | 8-9                             |
| Bias                       | <a href="#">#9</a> Describe any efforts to address potential sources of bias                                                                                                                                                                                                            | 16                              |
| Study size                 | <a href="#">#10</a> Explain how the study size was arrived at                                                                                                                                                                                                                           | n/a, all patients were included |

|    |                  |                      |                                                                   |               |
|----|------------------|----------------------|-------------------------------------------------------------------|---------------|
| 1  | Quantitative     | <a href="#">#11</a>  | Explain how quantitative variables were handled in the            | 10-11         |
| 2  | variables        |                      | analyses. If applicable, describe which groupings were chosen,    |               |
| 3  |                  |                      | and why                                                           |               |
| 4  |                  |                      |                                                                   |               |
| 5  |                  |                      |                                                                   |               |
| 6  | Statistical      | <a href="#">#12a</a> | Describe all statistical methods, including those used to control | 10-11         |
| 7  | methods          |                      | for confounding                                                   |               |
| 8  |                  |                      |                                                                   |               |
| 9  |                  |                      |                                                                   |               |
| 10 | Statistical      | <a href="#">#12b</a> | Describe any methods used to examine subgroups and                | 10-11         |
| 11 | methods          |                      | interactions                                                      |               |
| 12 |                  |                      |                                                                   |               |
| 13 |                  |                      |                                                                   |               |
| 14 | Statistical      | <a href="#">#12c</a> | Explain how missing data were addressed                           | n/a missing   |
| 15 | methods          |                      |                                                                   | variables are |
| 16 |                  |                      |                                                                   | reported in   |
| 17 |                  |                      |                                                                   | tables        |
| 18 |                  |                      |                                                                   |               |
| 19 |                  |                      |                                                                   |               |
| 20 |                  |                      |                                                                   |               |
| 21 | Statistical      | <a href="#">#12d</a> | If applicable, describe analytical methods taking account of      | n/a           |
| 22 | methods          |                      | sampling strategy                                                 |               |
| 23 |                  |                      |                                                                   |               |
| 24 | Statistical      | <a href="#">#12e</a> | Describe any sensitivity analyses                                 | n/a           |
| 25 | methods          |                      |                                                                   |               |
| 26 |                  |                      |                                                                   |               |
| 27 |                  |                      |                                                                   |               |
| 28 | <b>Results</b>   |                      |                                                                   |               |
| 29 |                  |                      |                                                                   |               |
| 30 |                  |                      |                                                                   |               |
| 31 | Participants     | <a href="#">#13a</a> | Report numbers of individuals at each stage of study—eg           | Table 1-4     |
| 32 |                  |                      | numbers potentially eligible, examined for eligibility, confirmed |               |
| 33 |                  |                      | eligible, included in the study, completing follow-up, and        |               |
| 34 |                  |                      | analysed. Give information separately for for exposed and         |               |
| 35 |                  |                      | unexposed groups if applicable.                                   |               |
| 36 |                  |                      |                                                                   |               |
| 37 |                  |                      |                                                                   |               |
| 38 |                  |                      |                                                                   |               |
| 39 | Participants     | <a href="#">#13b</a> | Give reasons for non-participation at each stage                  | n/a           |
| 40 |                  |                      |                                                                   |               |
| 41 | Participants     | <a href="#">#13c</a> | Consider use of a flow diagram                                    | Figure 1a and |
| 42 |                  |                      |                                                                   | b             |
| 43 |                  |                      |                                                                   |               |
| 44 |                  |                      |                                                                   |               |
| 45 | Descriptive data | <a href="#">#14a</a> | Give characteristics of study participants (eg demographic,       | 11, Table 1   |
| 46 |                  |                      | clinical, social) and information on exposures and potential      |               |
| 47 |                  |                      | confounders. Give information separately for exposed and          |               |
| 48 |                  |                      | unexposed groups if applicable.                                   |               |
| 49 |                  |                      |                                                                   |               |
| 50 |                  |                      |                                                                   |               |
| 51 |                  |                      |                                                                   |               |
| 52 | Descriptive data | <a href="#">#14b</a> | Indicate number of participants with missing data for each        | Table 1-4     |
| 53 |                  |                      | variable of interest                                              |               |
| 54 |                  |                      |                                                                   |               |
| 55 |                  |                      |                                                                   |               |
| 56 |                  |                      |                                                                   |               |
| 57 |                  |                      |                                                                   |               |
| 58 |                  |                      |                                                                   |               |
| 59 |                  |                      |                                                                   |               |
| 60 |                  |                      |                                                                   |               |

|    |                    |                      |                                                                                                                                                                                                          |           |
|----|--------------------|----------------------|----------------------------------------------------------------------------------------------------------------------------------------------------------------------------------------------------------|-----------|
| 1  | Outcome data       | <a href="#">#15</a>  | Report numbers of outcome events or summary measures. Give information separately for exposed and unexposed groups if applicable.                                                                        | Table 1-4 |
| 2  |                    |                      |                                                                                                                                                                                                          |           |
| 3  |                    |                      |                                                                                                                                                                                                          |           |
| 4  |                    |                      |                                                                                                                                                                                                          |           |
| 5  |                    |                      |                                                                                                                                                                                                          |           |
| 6  | Main results       | <a href="#">#16a</a> | Give unadjusted estimates and, if applicable, confounder-adjusted estimates and their precision (eg, 95% confidence interval). Make clear which confounders were adjusted for and why they were included | n/a       |
| 7  |                    |                      |                                                                                                                                                                                                          |           |
| 8  |                    |                      |                                                                                                                                                                                                          |           |
| 9  |                    |                      |                                                                                                                                                                                                          |           |
| 10 |                    |                      |                                                                                                                                                                                                          |           |
| 11 |                    |                      |                                                                                                                                                                                                          |           |
| 12 |                    |                      |                                                                                                                                                                                                          |           |
| 13 | Main results       | <a href="#">#16b</a> | Report category boundaries when continuous variables were categorized                                                                                                                                    | n/a       |
| 14 |                    |                      |                                                                                                                                                                                                          |           |
| 15 |                    |                      |                                                                                                                                                                                                          |           |
| 16 |                    |                      |                                                                                                                                                                                                          |           |
| 17 | Main results       | <a href="#">#16c</a> | If relevant, consider translating estimates of relative risk into absolute risk for a meaningful time period                                                                                             | n/a       |
| 18 |                    |                      |                                                                                                                                                                                                          |           |
| 19 |                    |                      |                                                                                                                                                                                                          |           |
| 20 |                    |                      |                                                                                                                                                                                                          |           |
| 21 | Other analyses     | <a href="#">#17</a>  | Report other analyses done—e.g., analyses of subgroups and interactions, and sensitivity analyses                                                                                                        | Table 2-4 |
| 22 |                    |                      |                                                                                                                                                                                                          |           |
| 23 |                    |                      |                                                                                                                                                                                                          |           |
| 24 |                    |                      |                                                                                                                                                                                                          |           |
| 25 | <b>Discussion</b>  |                      |                                                                                                                                                                                                          |           |
| 26 |                    |                      |                                                                                                                                                                                                          |           |
| 27 | Key results        | <a href="#">#18</a>  | Summarise key results with reference to study objectives                                                                                                                                                 | 16        |
| 28 |                    |                      |                                                                                                                                                                                                          |           |
| 29 | Limitations        | <a href="#">#19</a>  | Discuss limitations of the study, taking into account sources of potential bias or imprecision. Discuss both direction and magnitude of any potential bias.                                              | 16-17     |
| 30 |                    |                      |                                                                                                                                                                                                          |           |
| 31 |                    |                      |                                                                                                                                                                                                          |           |
| 32 |                    |                      |                                                                                                                                                                                                          |           |
| 33 |                    |                      |                                                                                                                                                                                                          |           |
| 34 | Interpretation     | <a href="#">#20</a>  | Give a cautious overall interpretation considering objectives, limitations, multiplicity of analyses, results from similar studies, and other relevant evidence.                                         | 17-19     |
| 35 |                    |                      |                                                                                                                                                                                                          |           |
| 36 |                    |                      |                                                                                                                                                                                                          |           |
| 37 |                    |                      |                                                                                                                                                                                                          |           |
| 38 |                    |                      |                                                                                                                                                                                                          |           |
| 39 |                    |                      |                                                                                                                                                                                                          |           |
| 40 | Generalisability   | <a href="#">#21</a>  | Discuss the generalisability (external validity) of the study results                                                                                                                                    | 18-20     |
| 41 |                    |                      |                                                                                                                                                                                                          |           |
| 42 |                    |                      |                                                                                                                                                                                                          |           |
| 43 |                    |                      |                                                                                                                                                                                                          |           |
| 44 | <b>Other</b>       |                      |                                                                                                                                                                                                          |           |
| 45 | <b>Information</b> |                      |                                                                                                                                                                                                          |           |
| 46 |                    |                      |                                                                                                                                                                                                          |           |
| 47 | Funding            | <a href="#">#22</a>  | Give the source of funding and the role of the funders for the present study and, if applicable, for the original study on which the present article is based                                            | 21        |
| 48 |                    |                      |                                                                                                                                                                                                          |           |
| 49 |                    |                      |                                                                                                                                                                                                          |           |
| 50 |                    |                      |                                                                                                                                                                                                          |           |
| 51 |                    |                      |                                                                                                                                                                                                          |           |
| 52 |                    |                      |                                                                                                                                                                                                          |           |

None The STROBE checklist is distributed under the terms of the Creative Commons Attribution License CC-BY. This checklist can be completed online using <https://www.goodreports.org/>, a tool made by the [EQUATOR Network](#) in collaboration with [Penelope.ai](#)
